# Supplementary material for: An efficient Au-catalyzed synthesis of isomukonidine, clausine L, mukonidine, glycosinine, mukonal, and clausine V from propadienyl methyl ether
Source: Royal Society of Chemistry journal article supplement (doi:10.1039/c2ob27432a), 2012-12-20

**An Efficient Au-Catalyzed Synthesis of Isomukonidine, Clausine L,  
Mukonidine, Glycosinine, Mukonal, and Clausine V from  
Propadienyl Methyl Ether**

Youai Qiu, Dengke Ma, Chunling Fu, and Shengming Ma<sup>\*</sup>

*Laboratory of Molecular Recognition and Synthesis, Department of Chemistry,  
Zhejiang University, 310027 Hangzhou, Zhejiang, P. R. China*

Fax: (+86) 21-62609305;

E-mail: [masm@mail.sioc.ac.cn](mailto:masm@mail.sioc.ac.cn)

Supporting Information

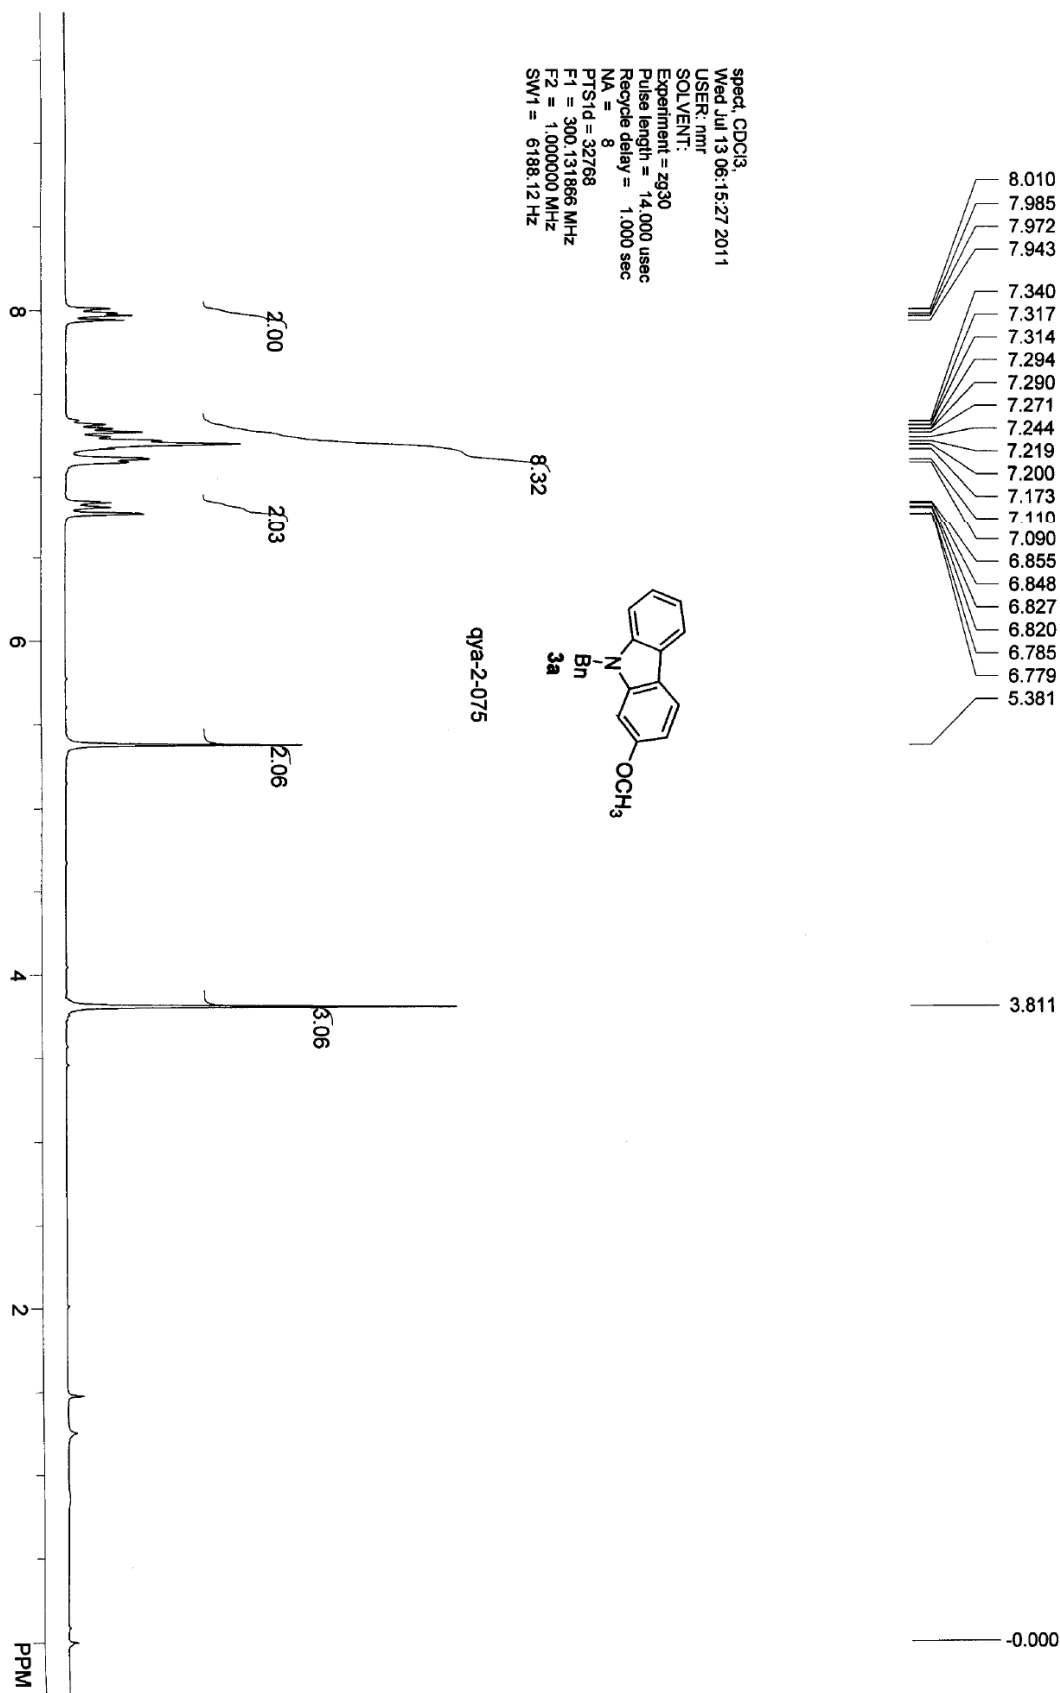

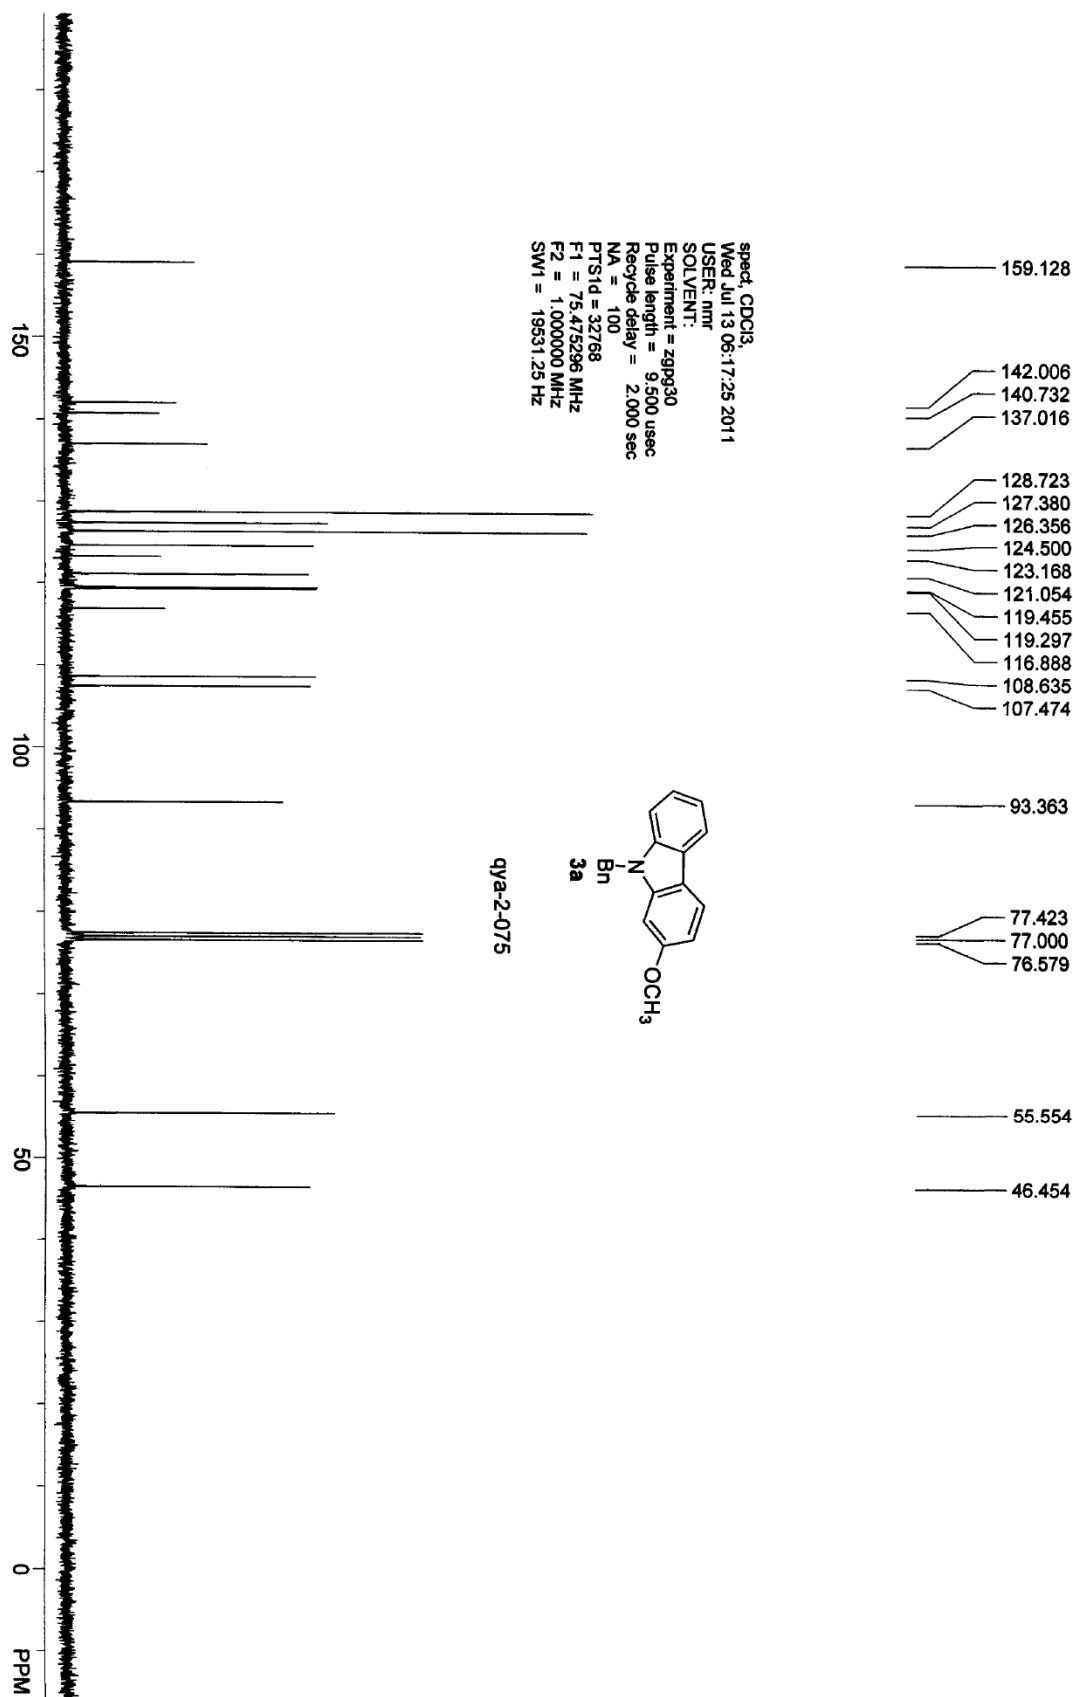

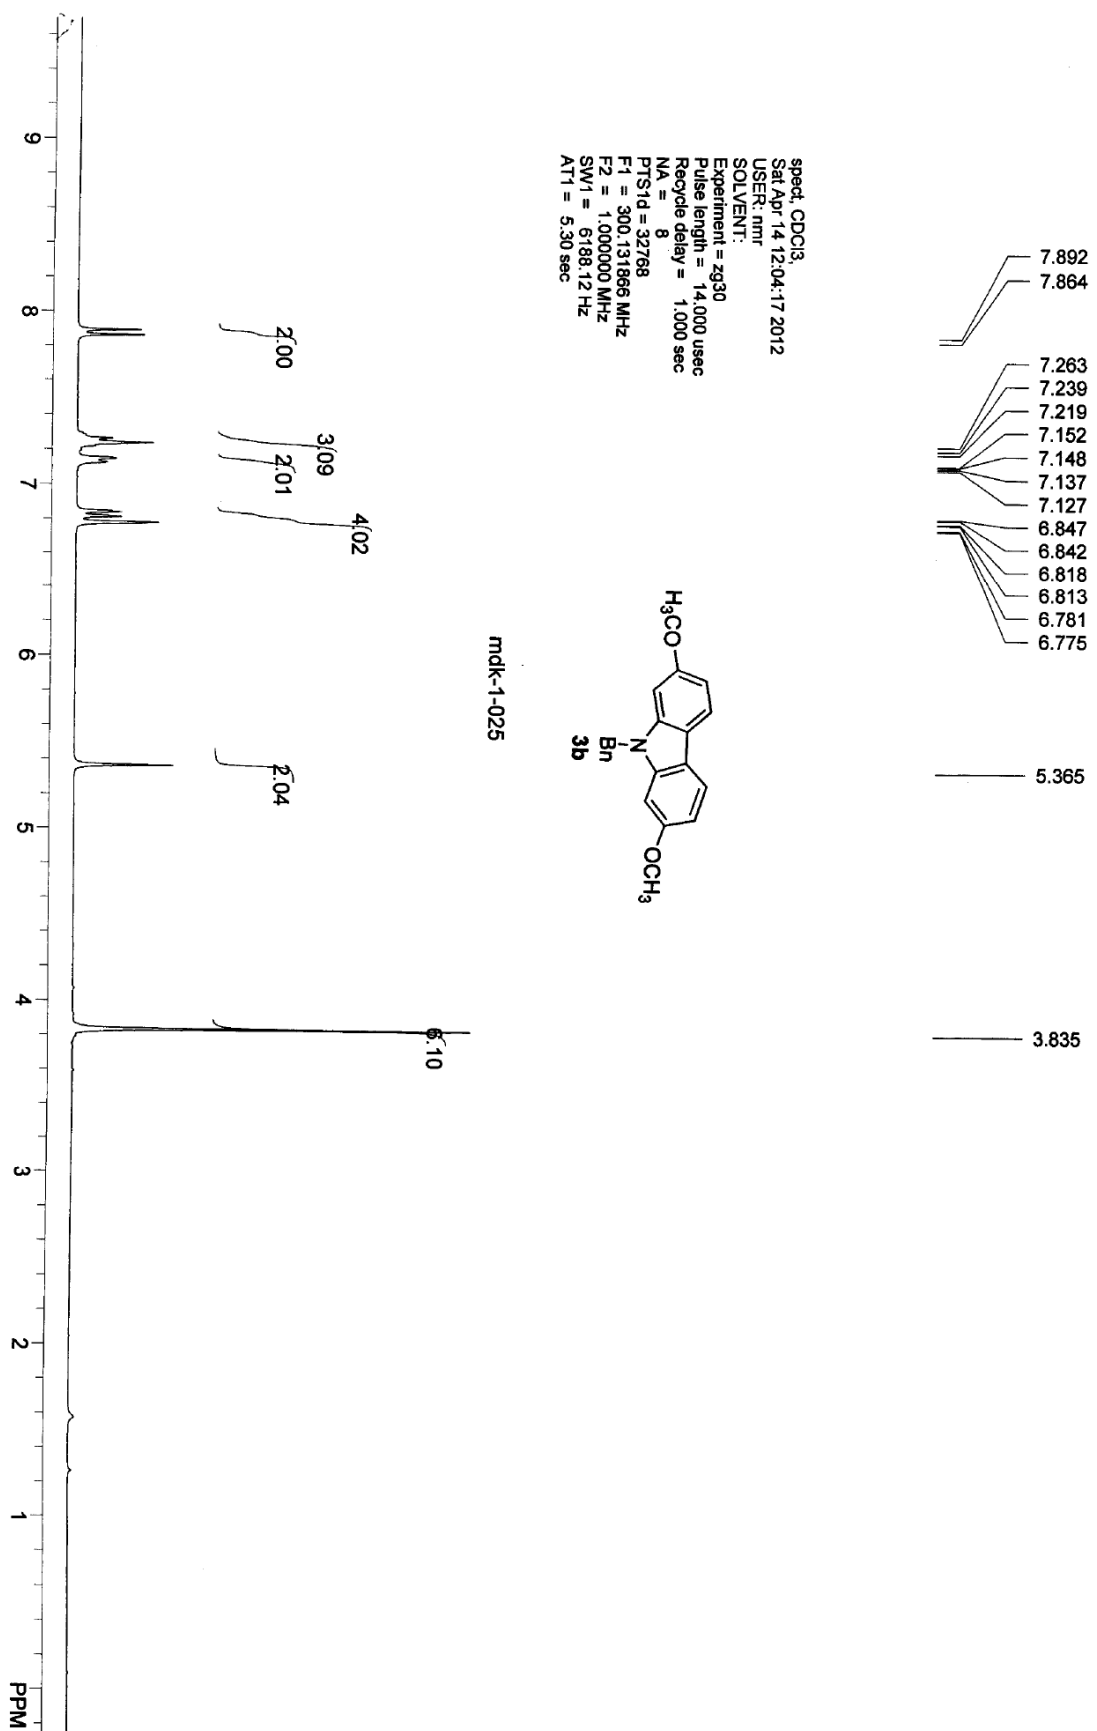

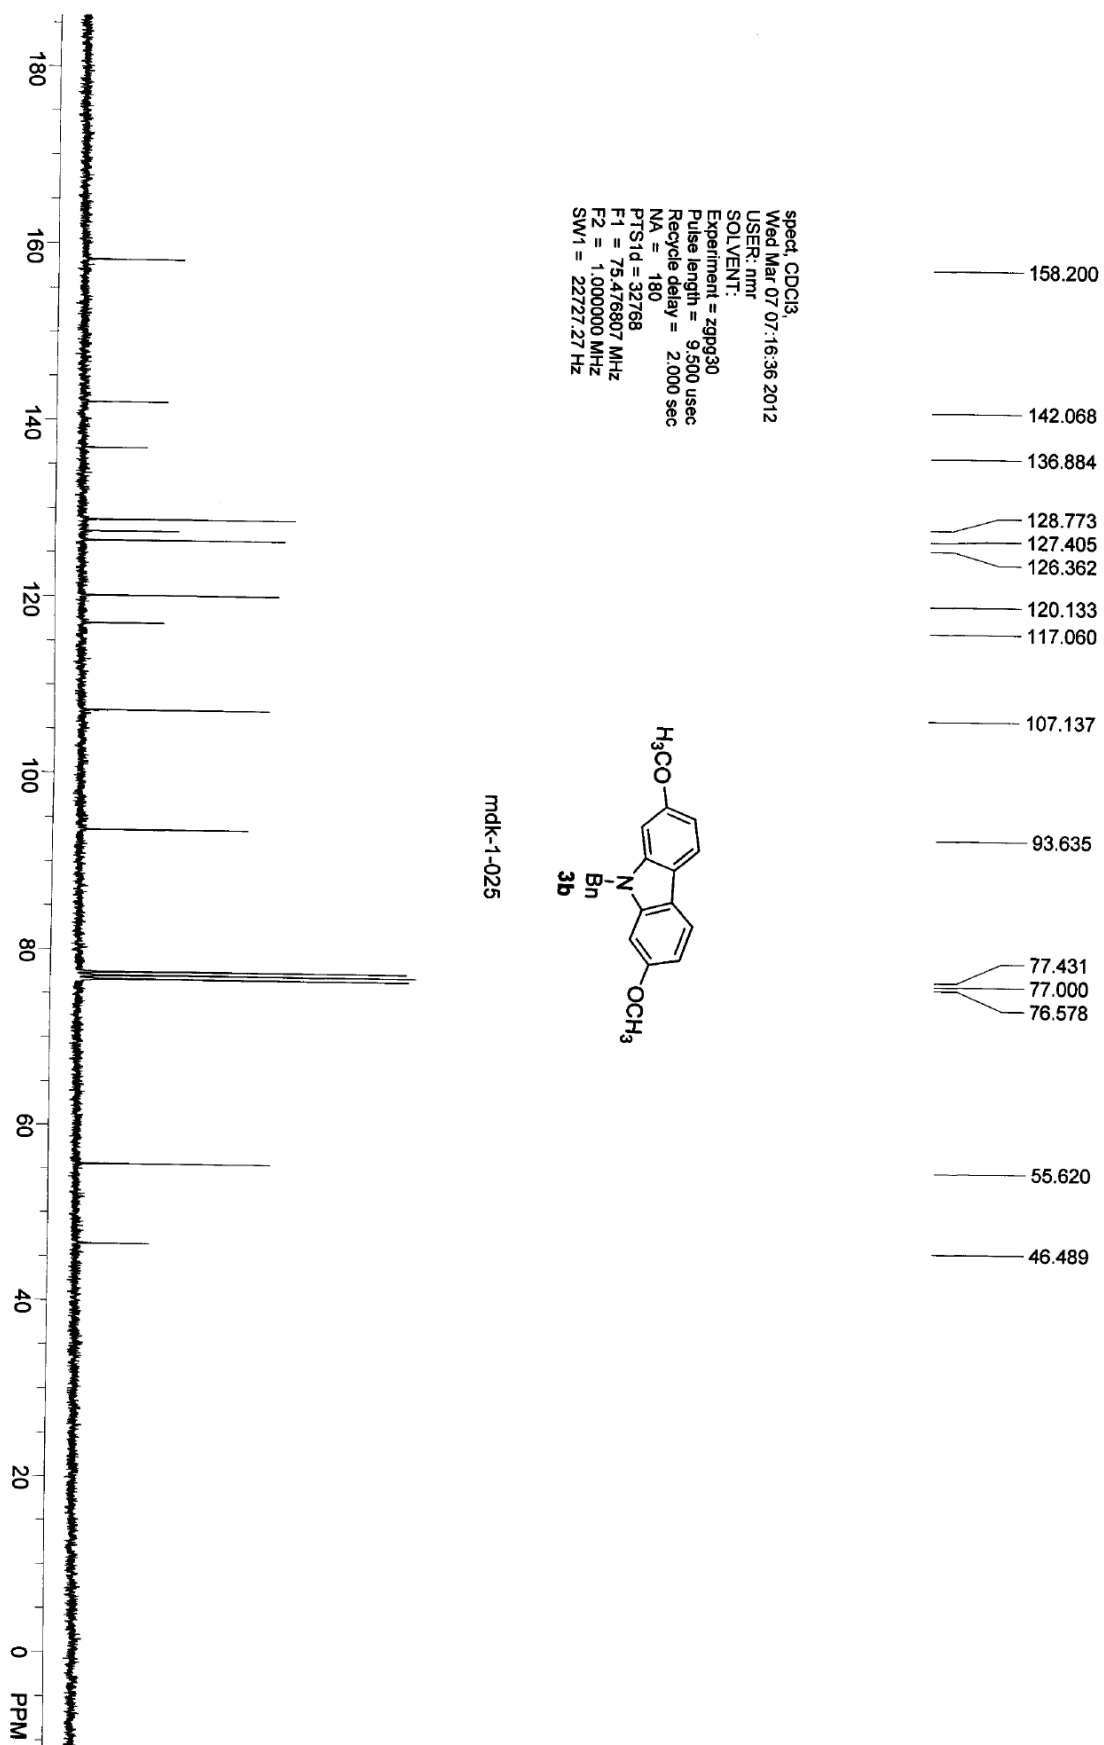

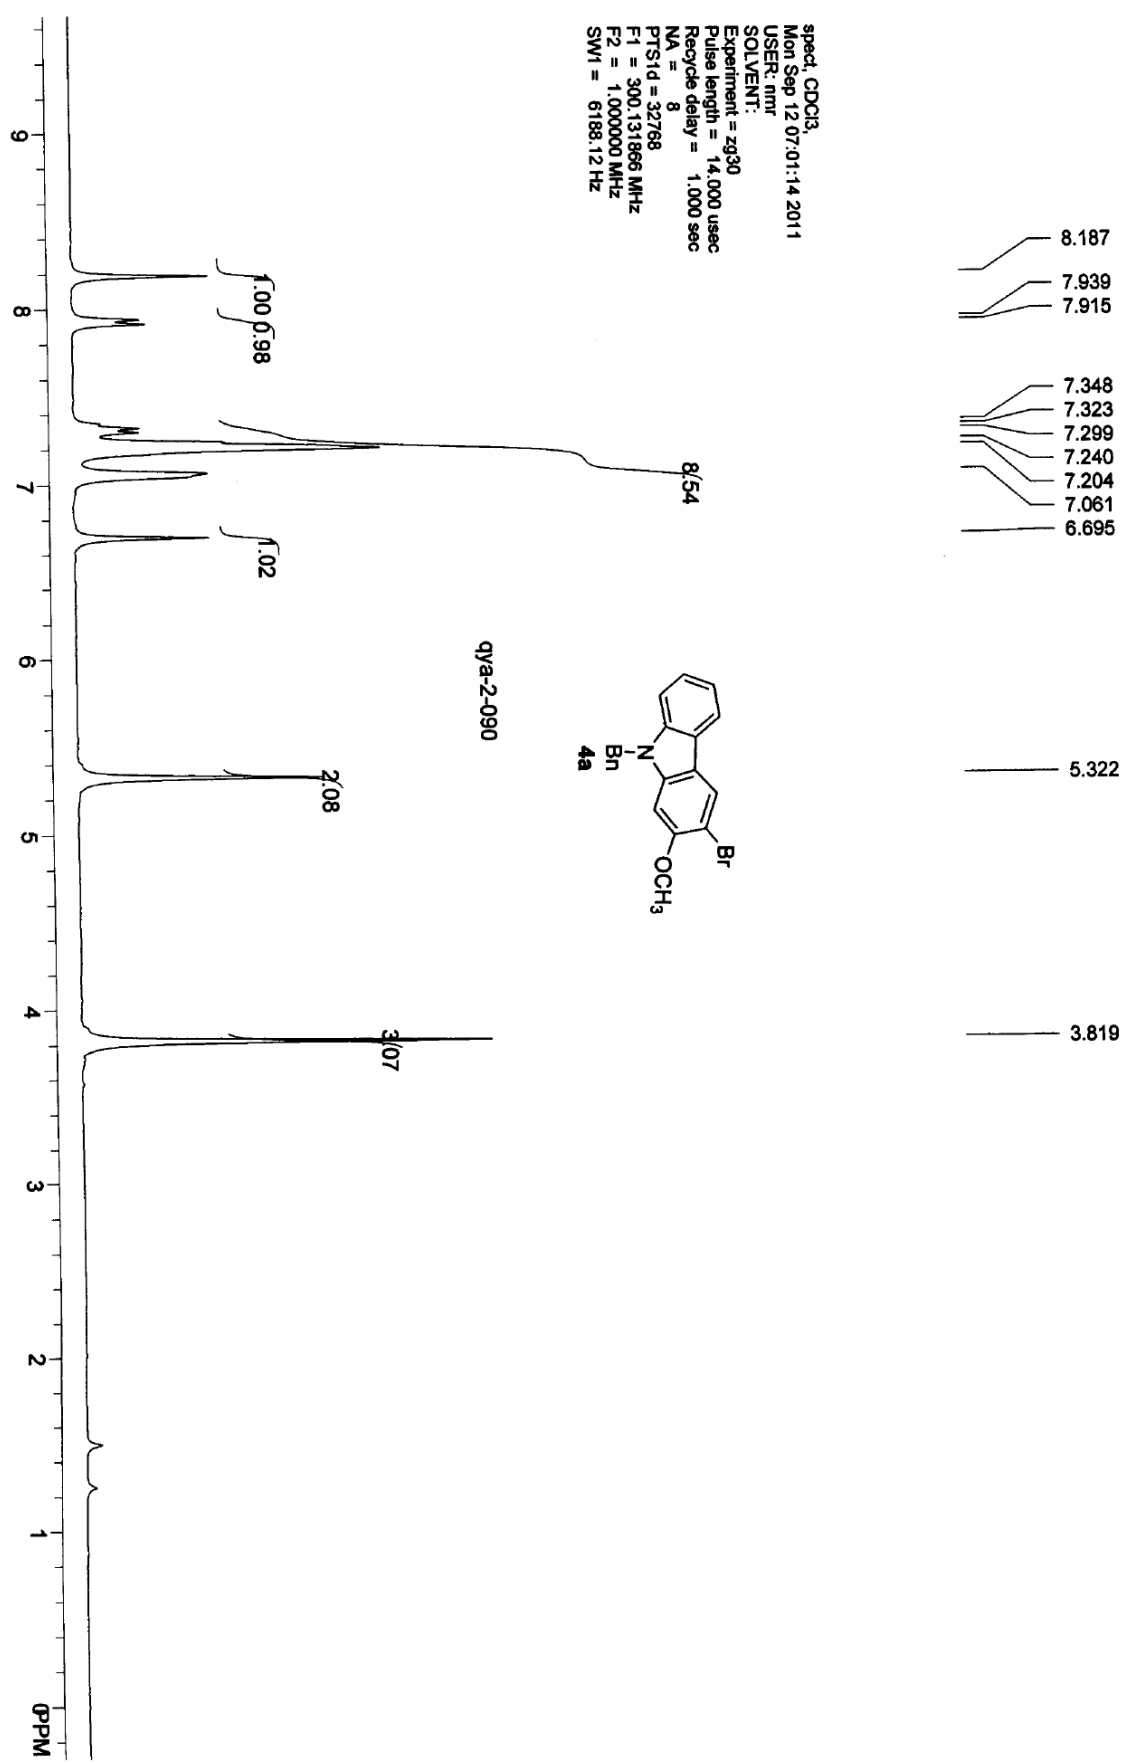

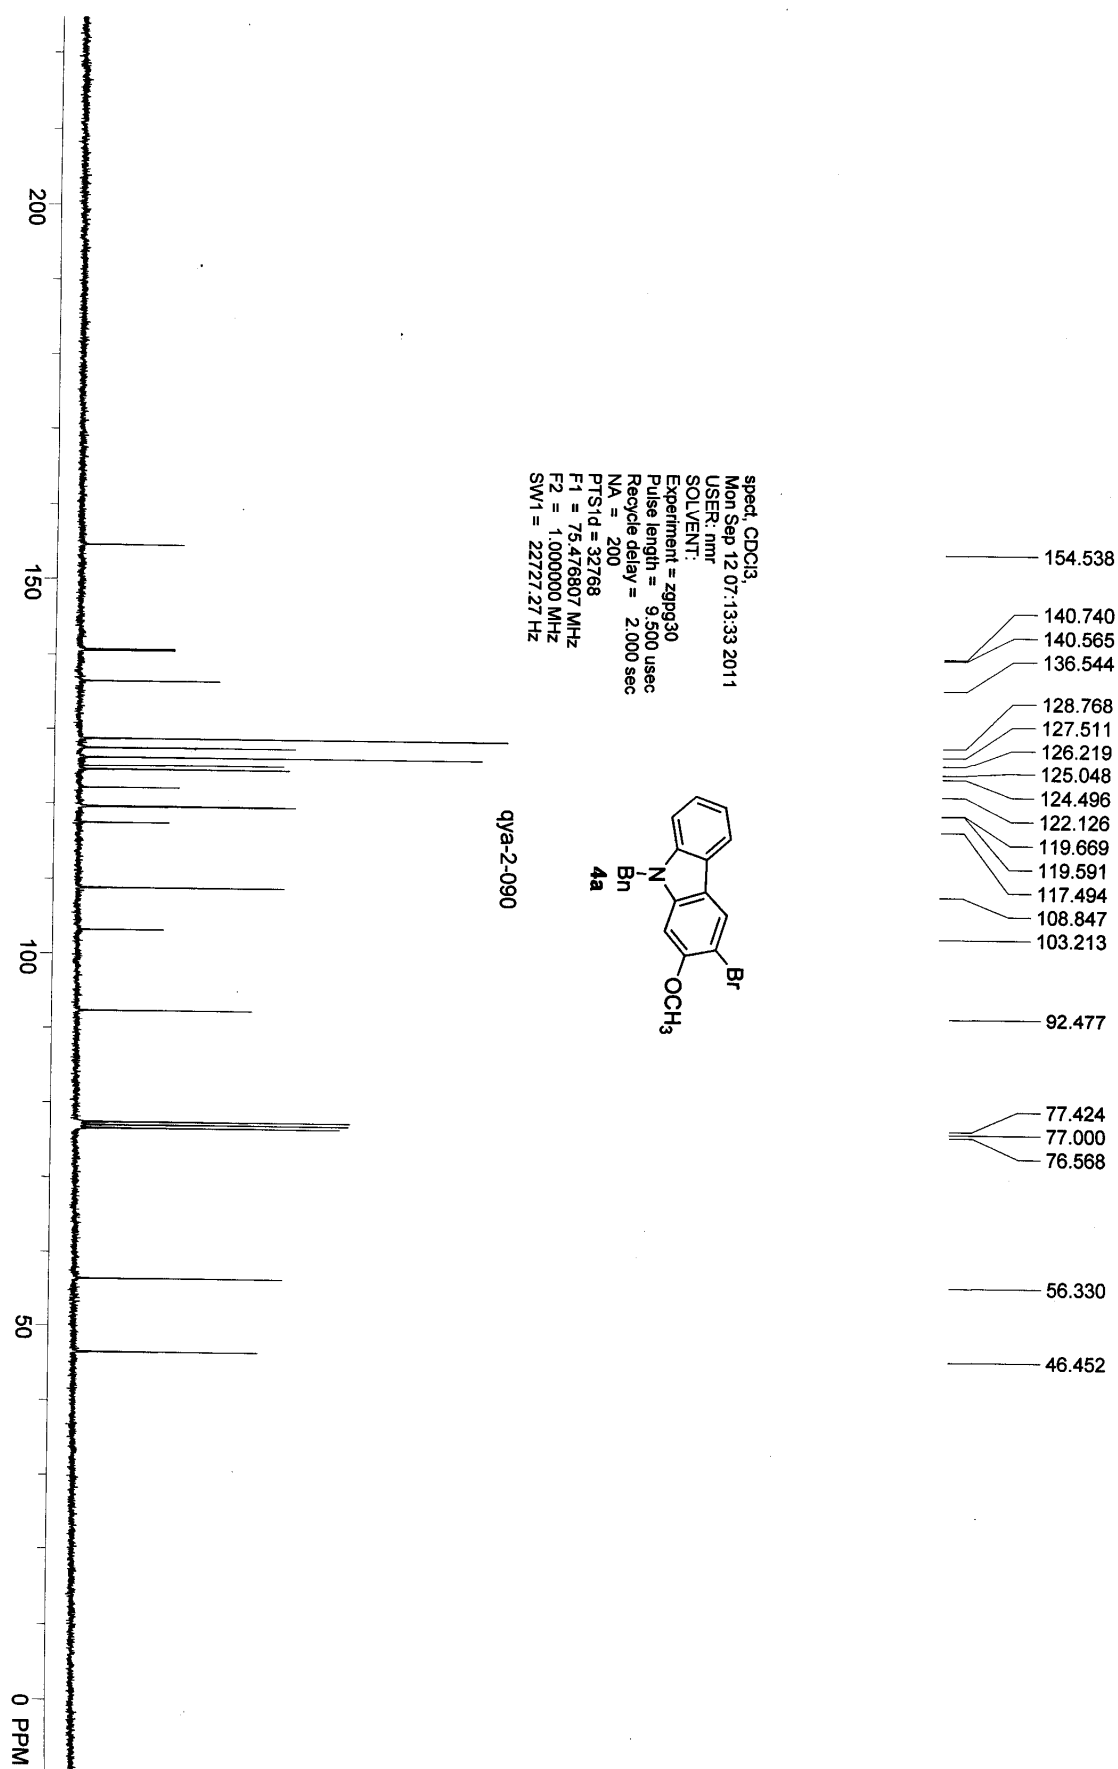

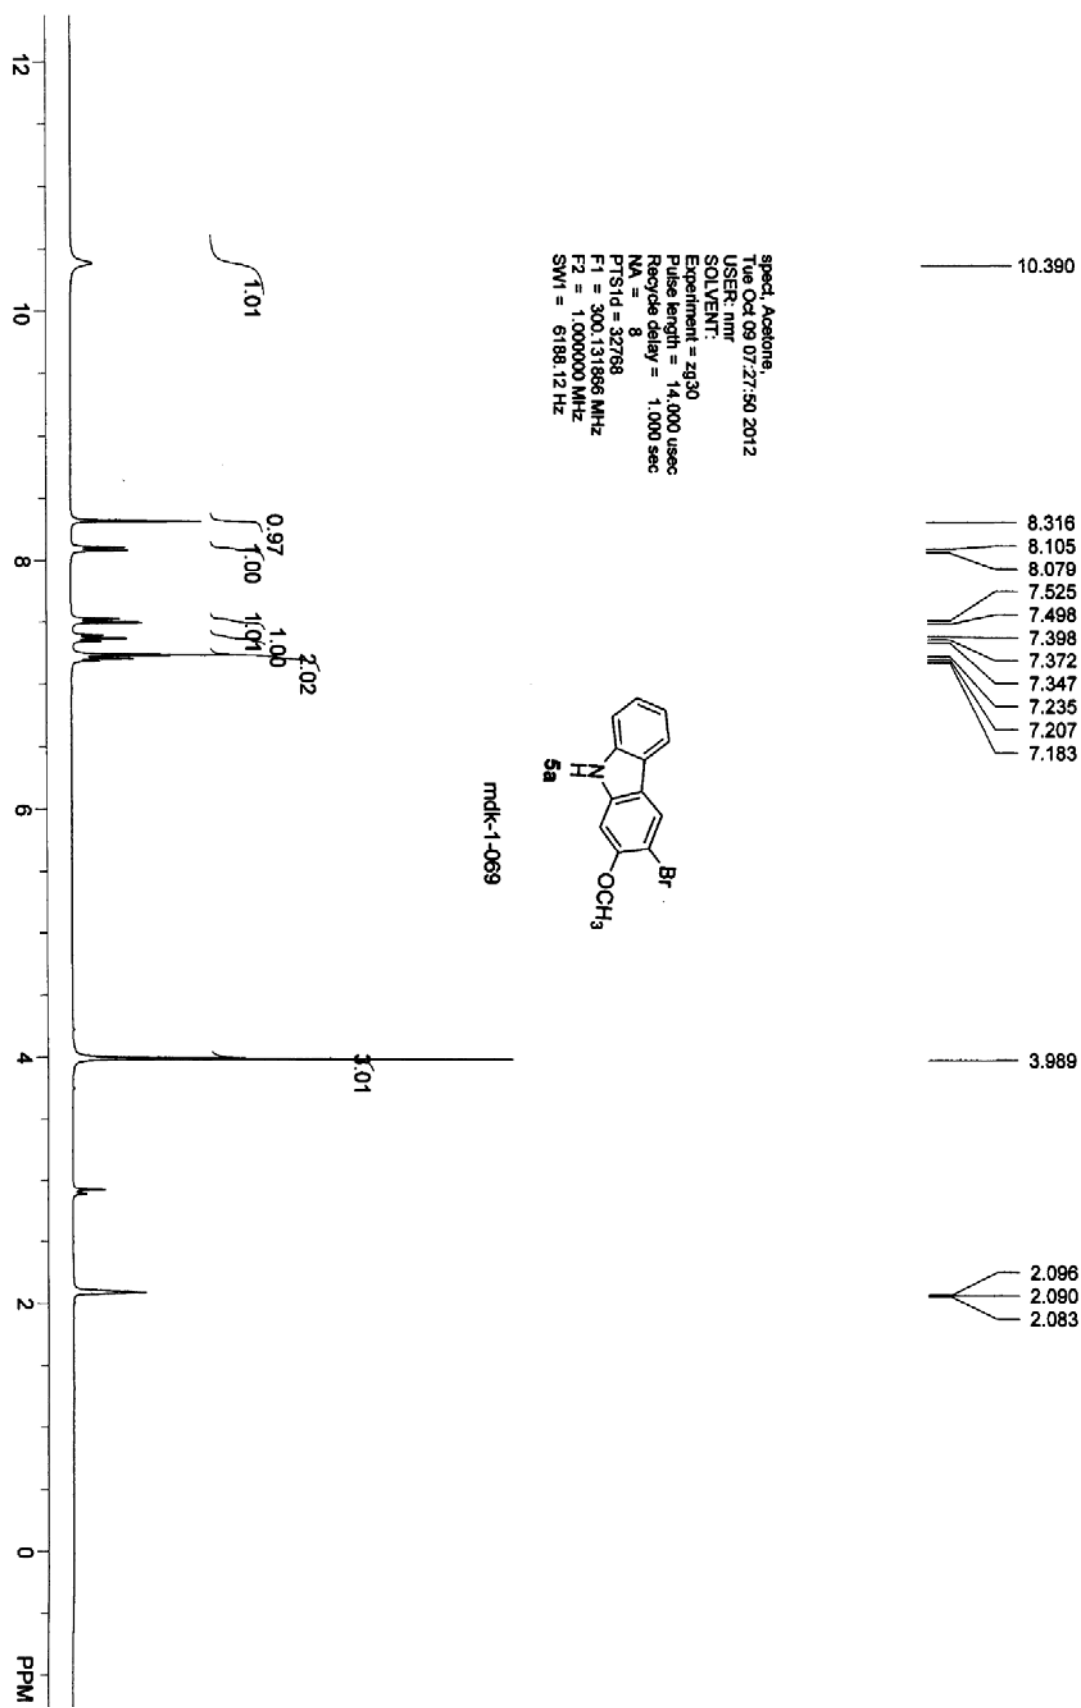

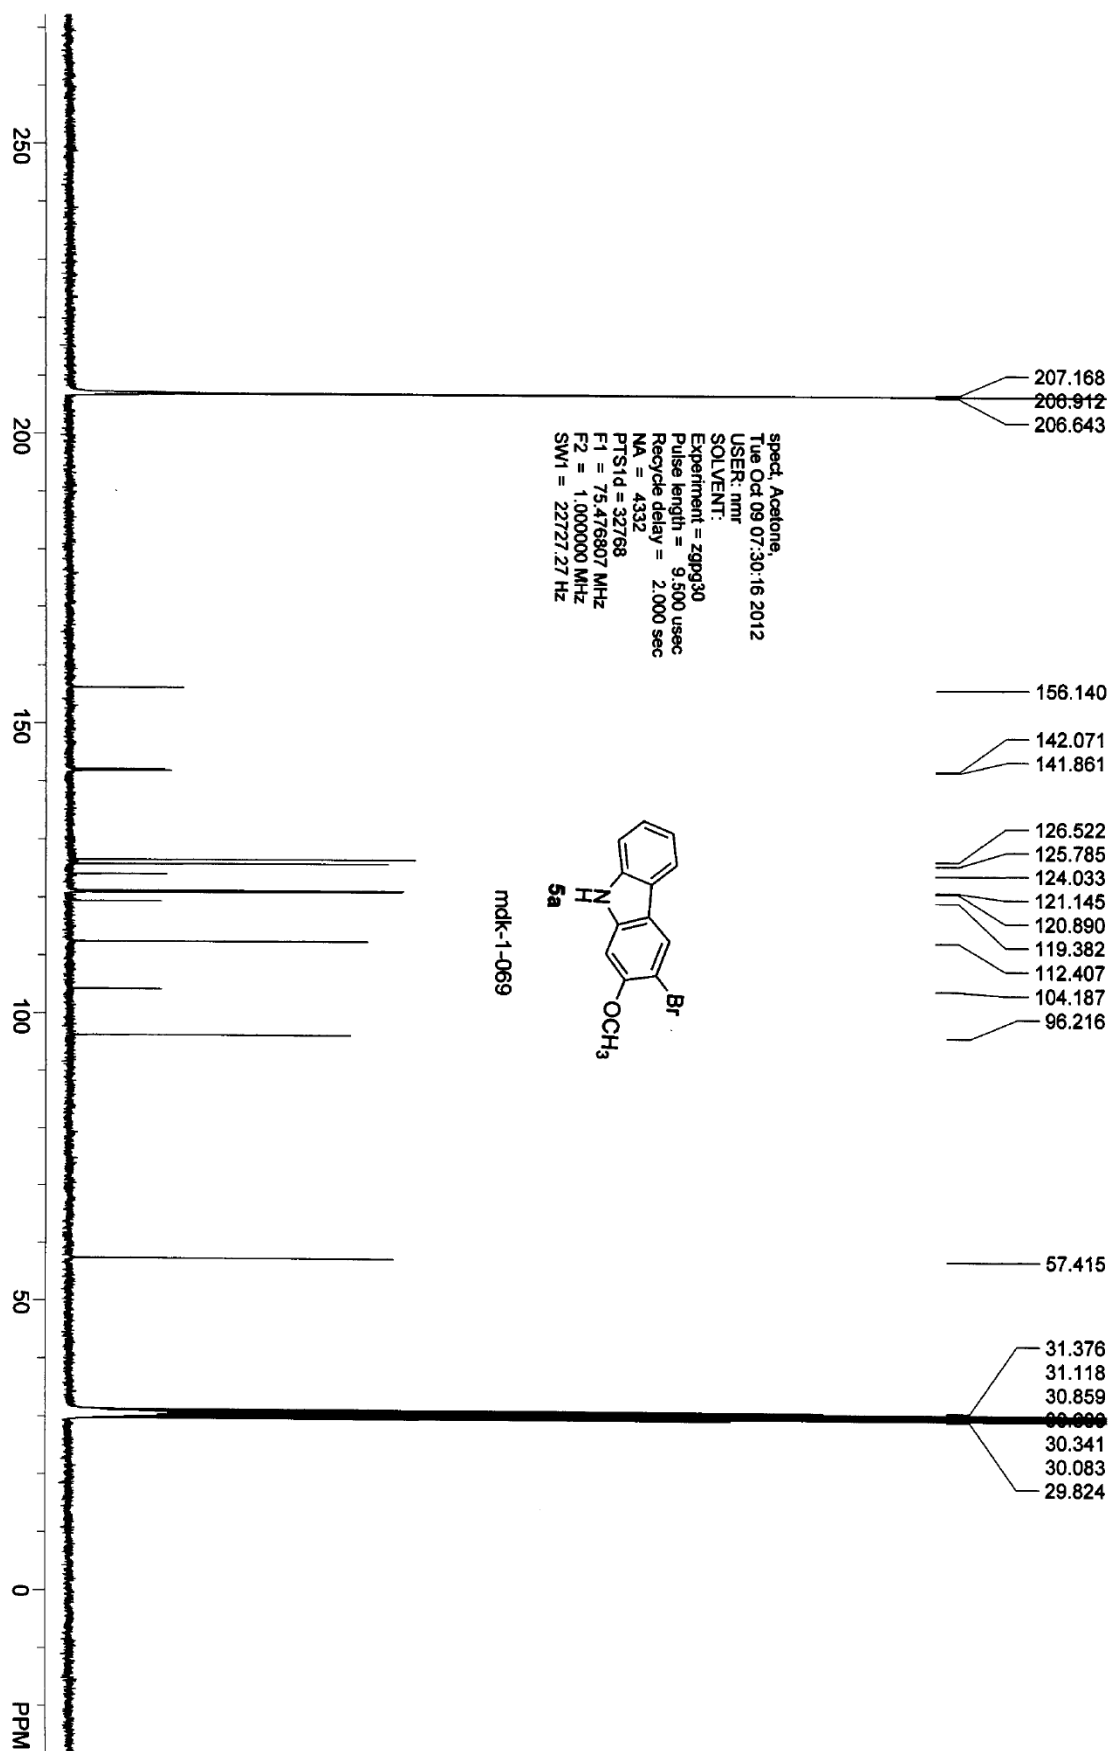

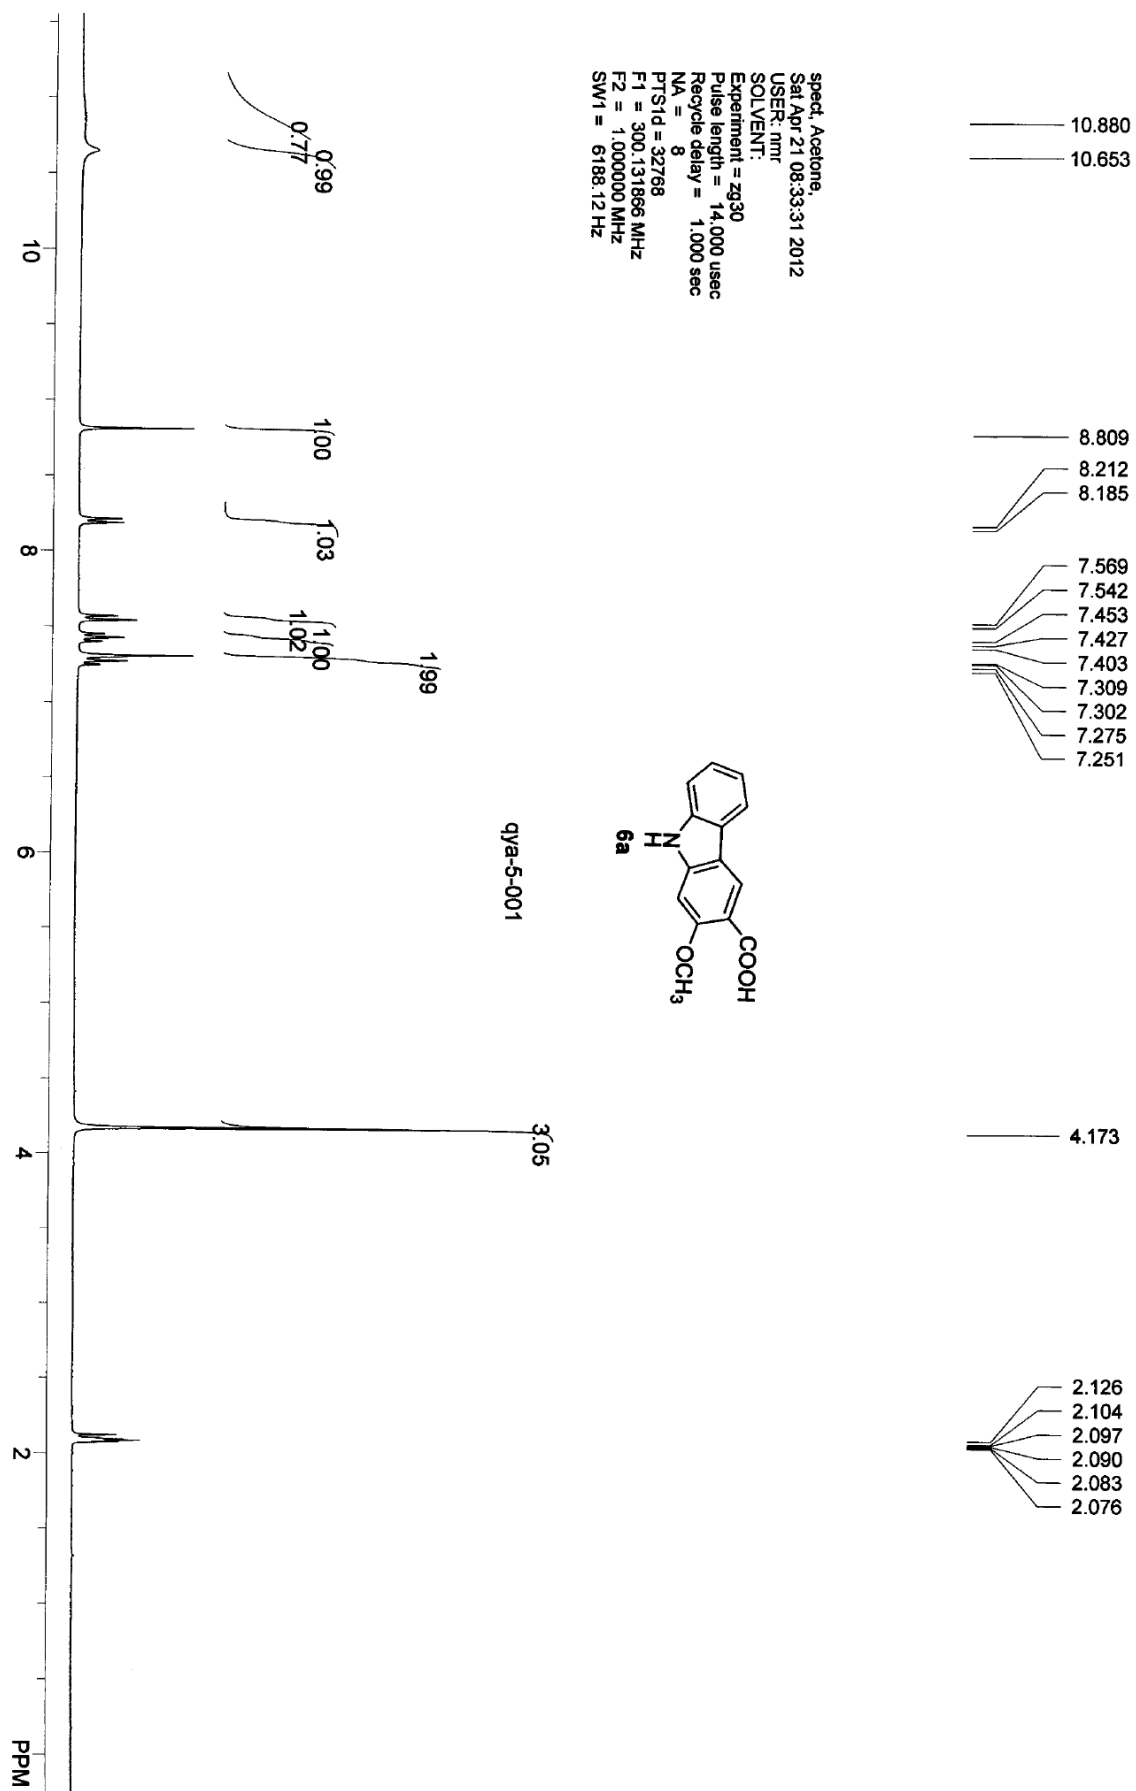

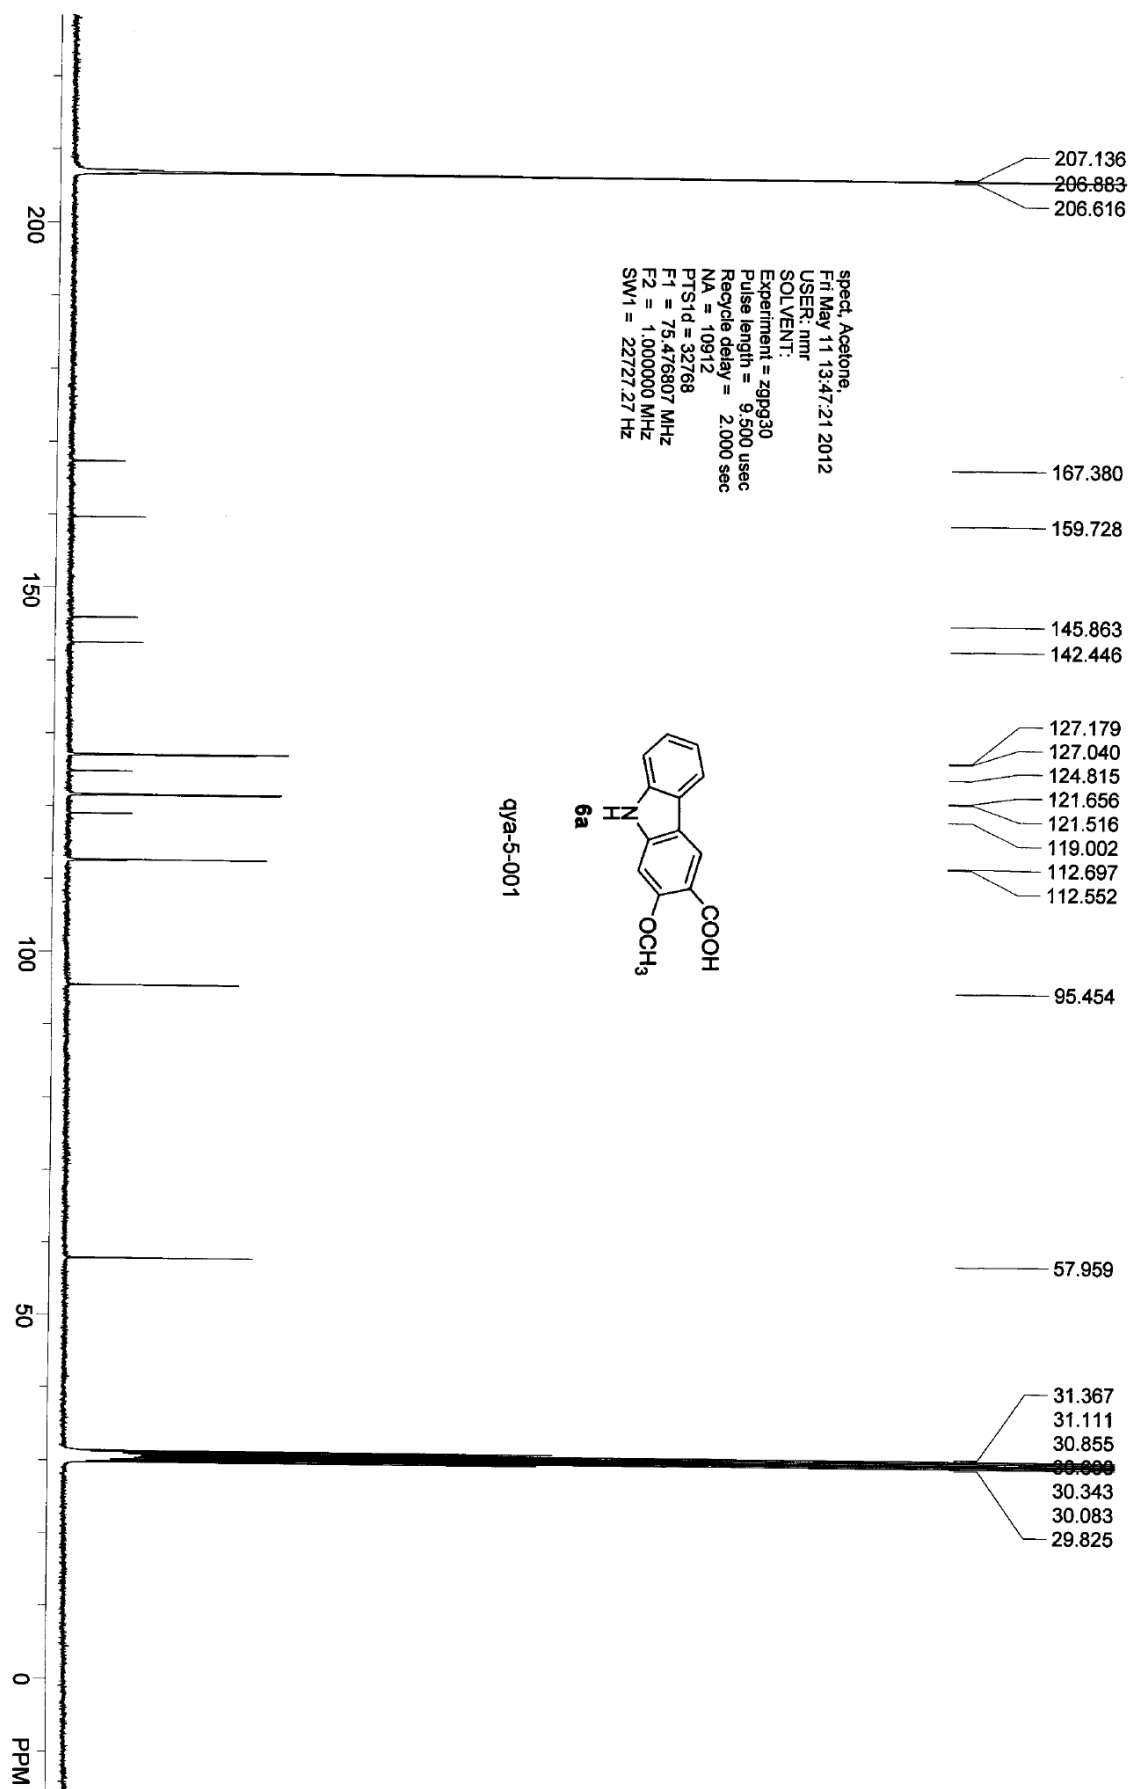

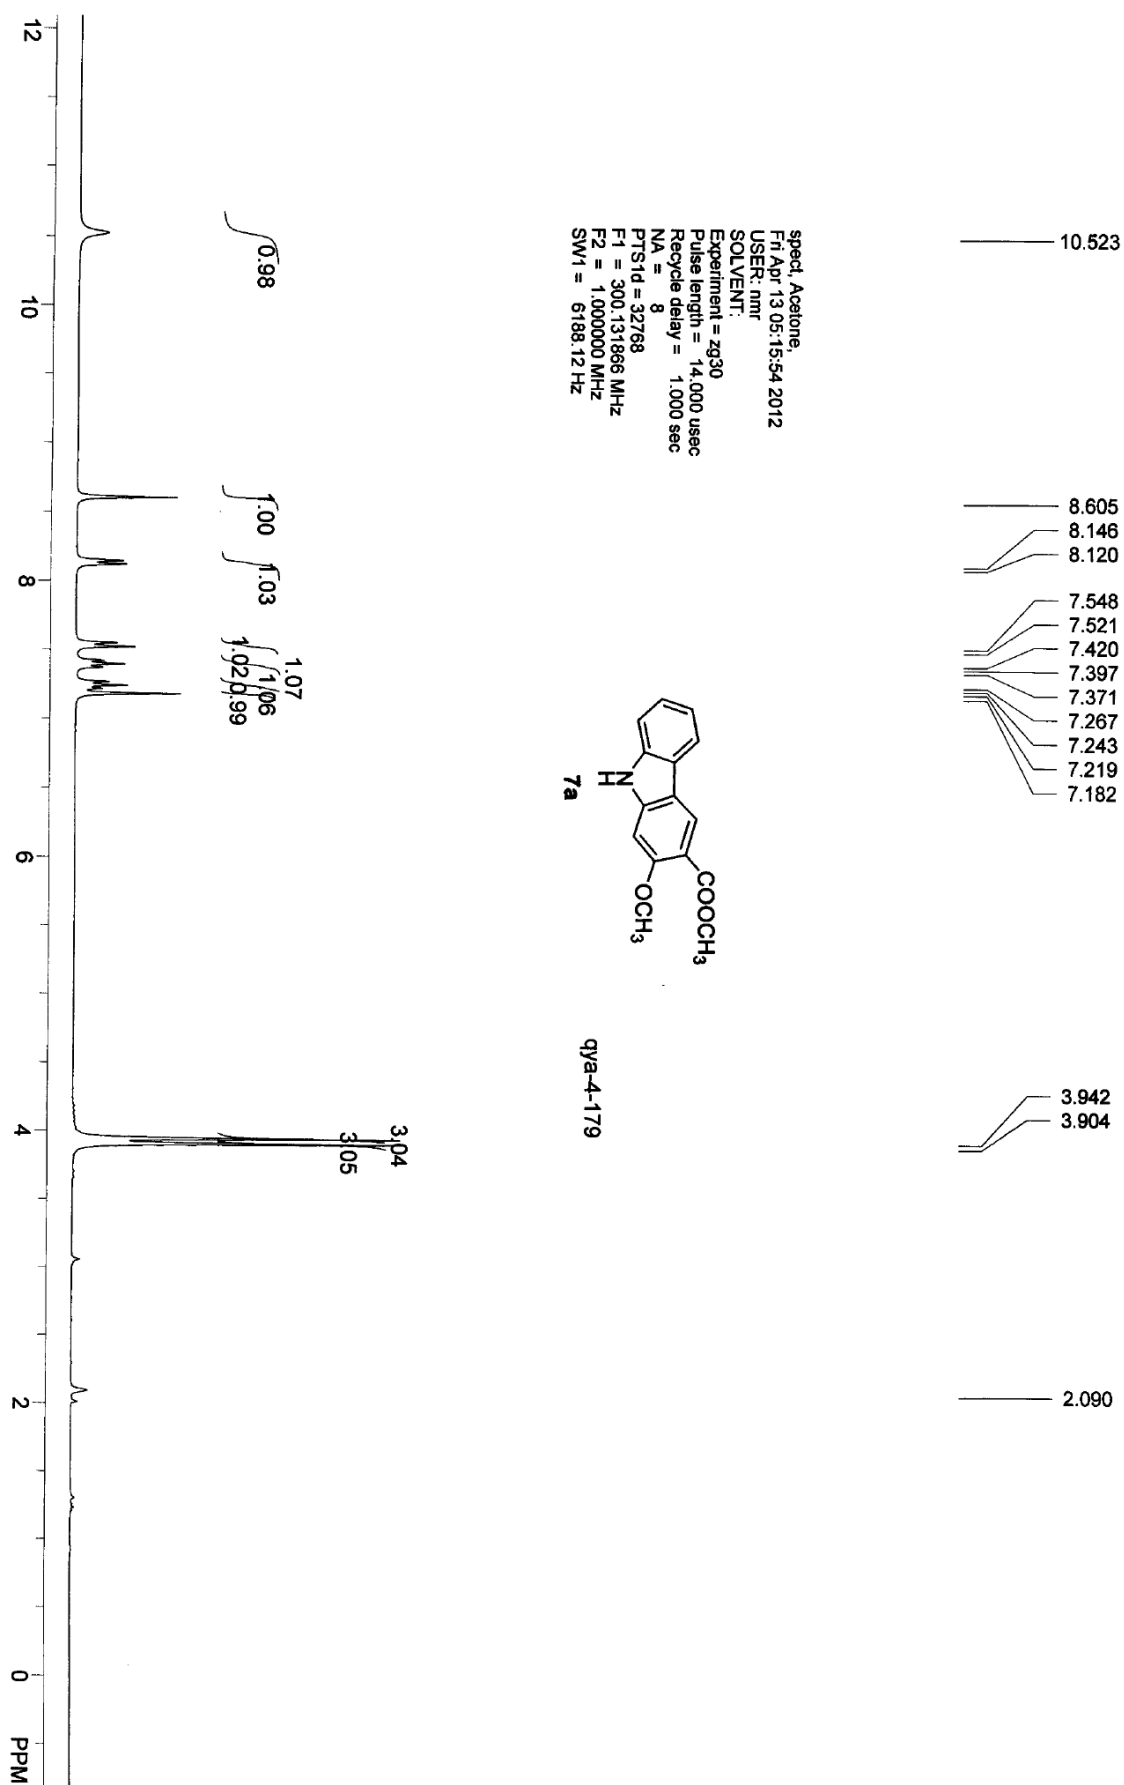

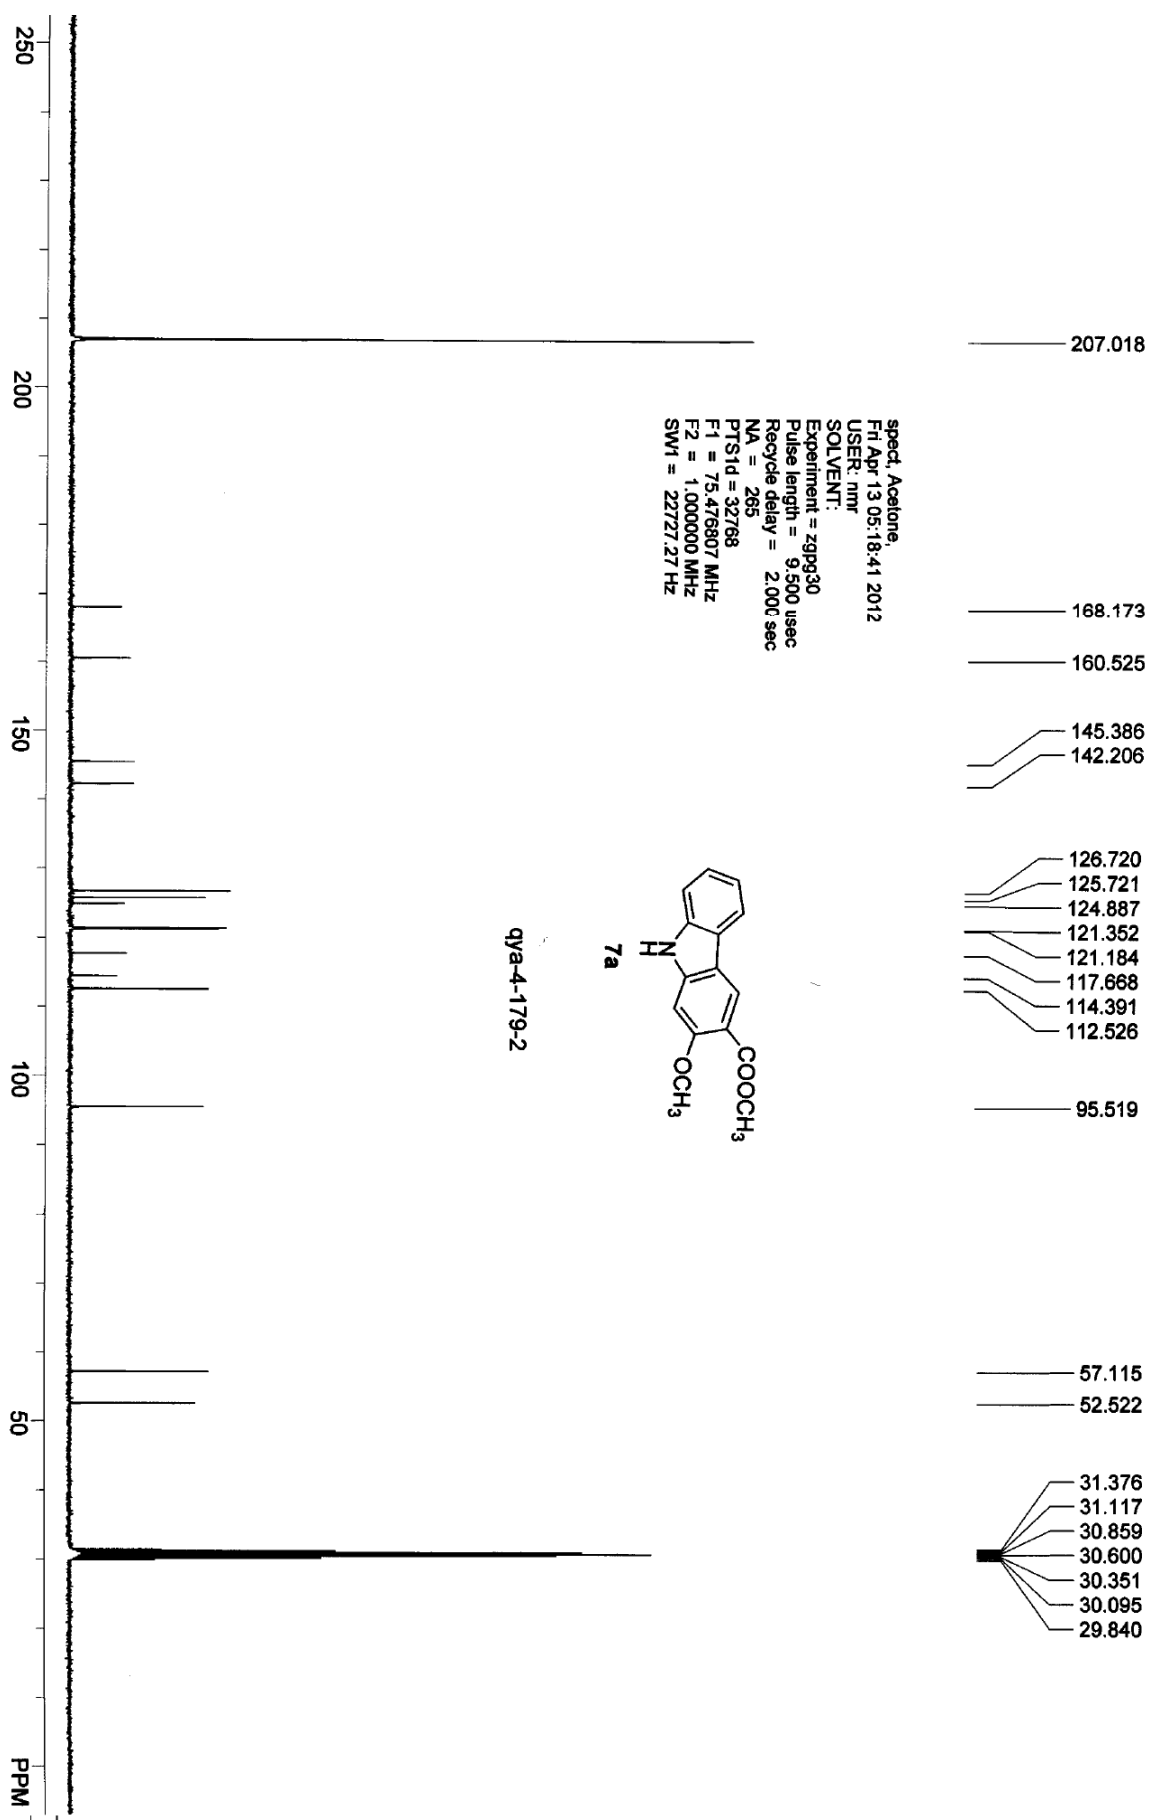

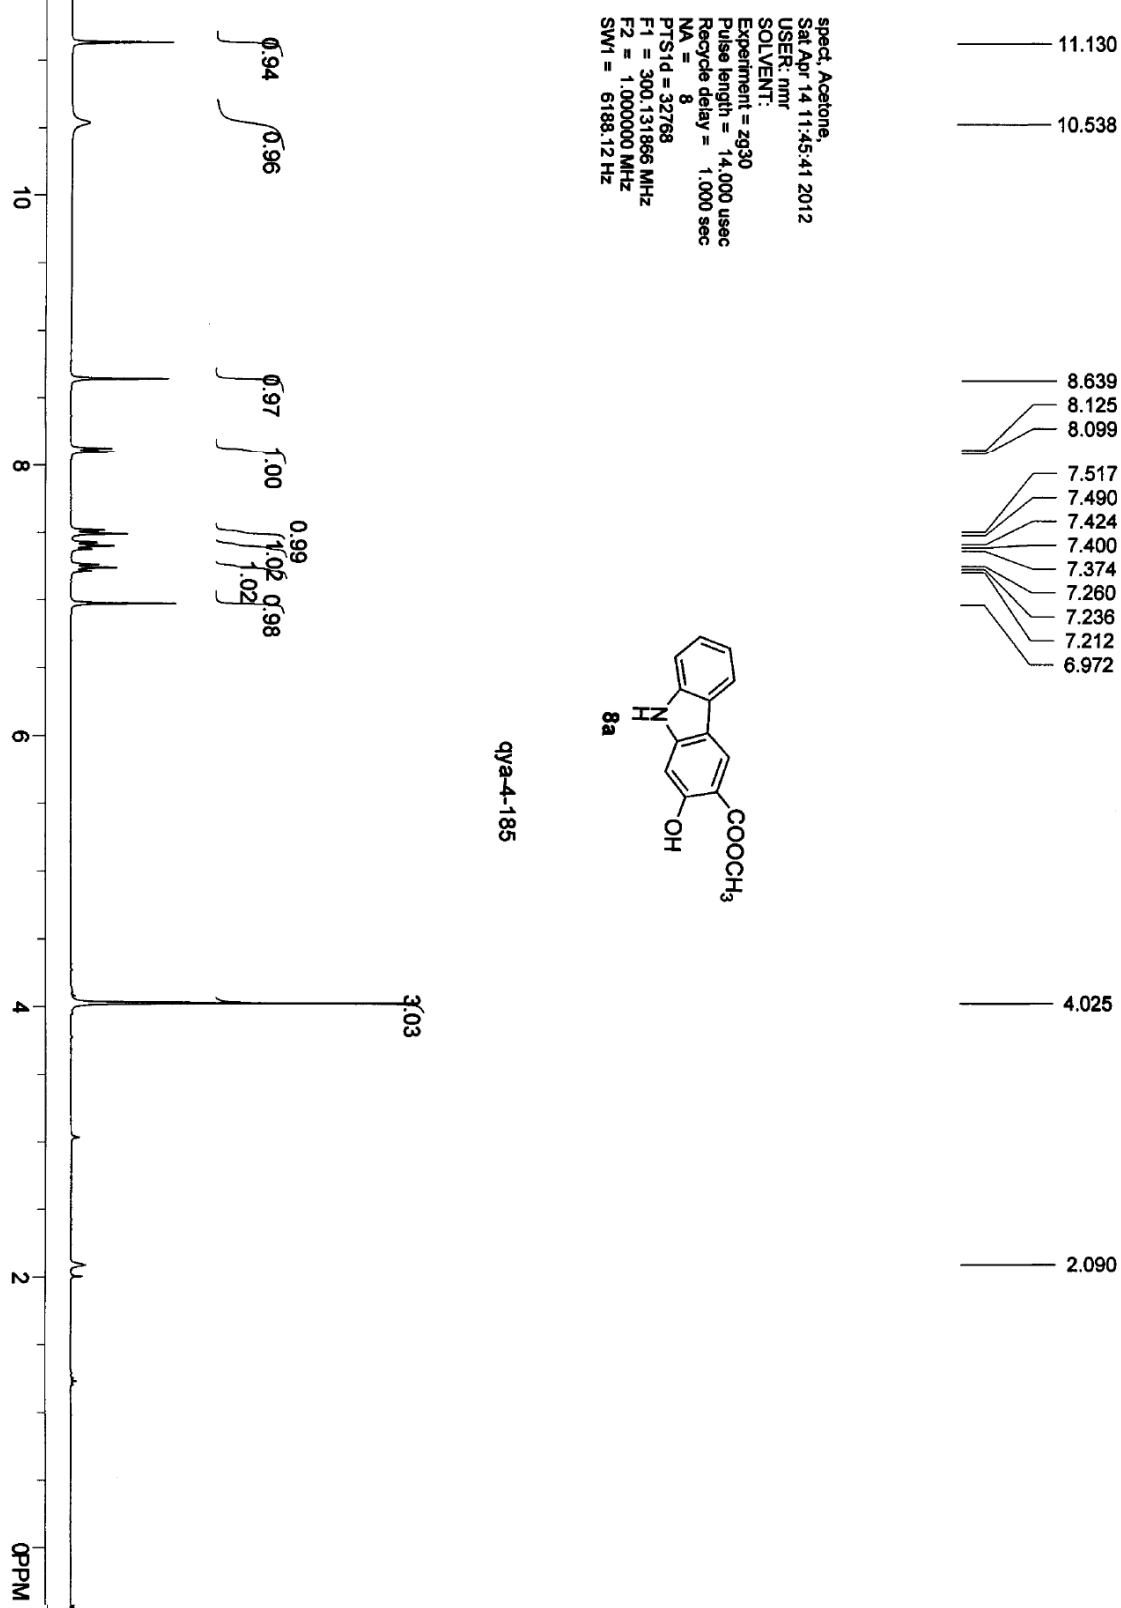

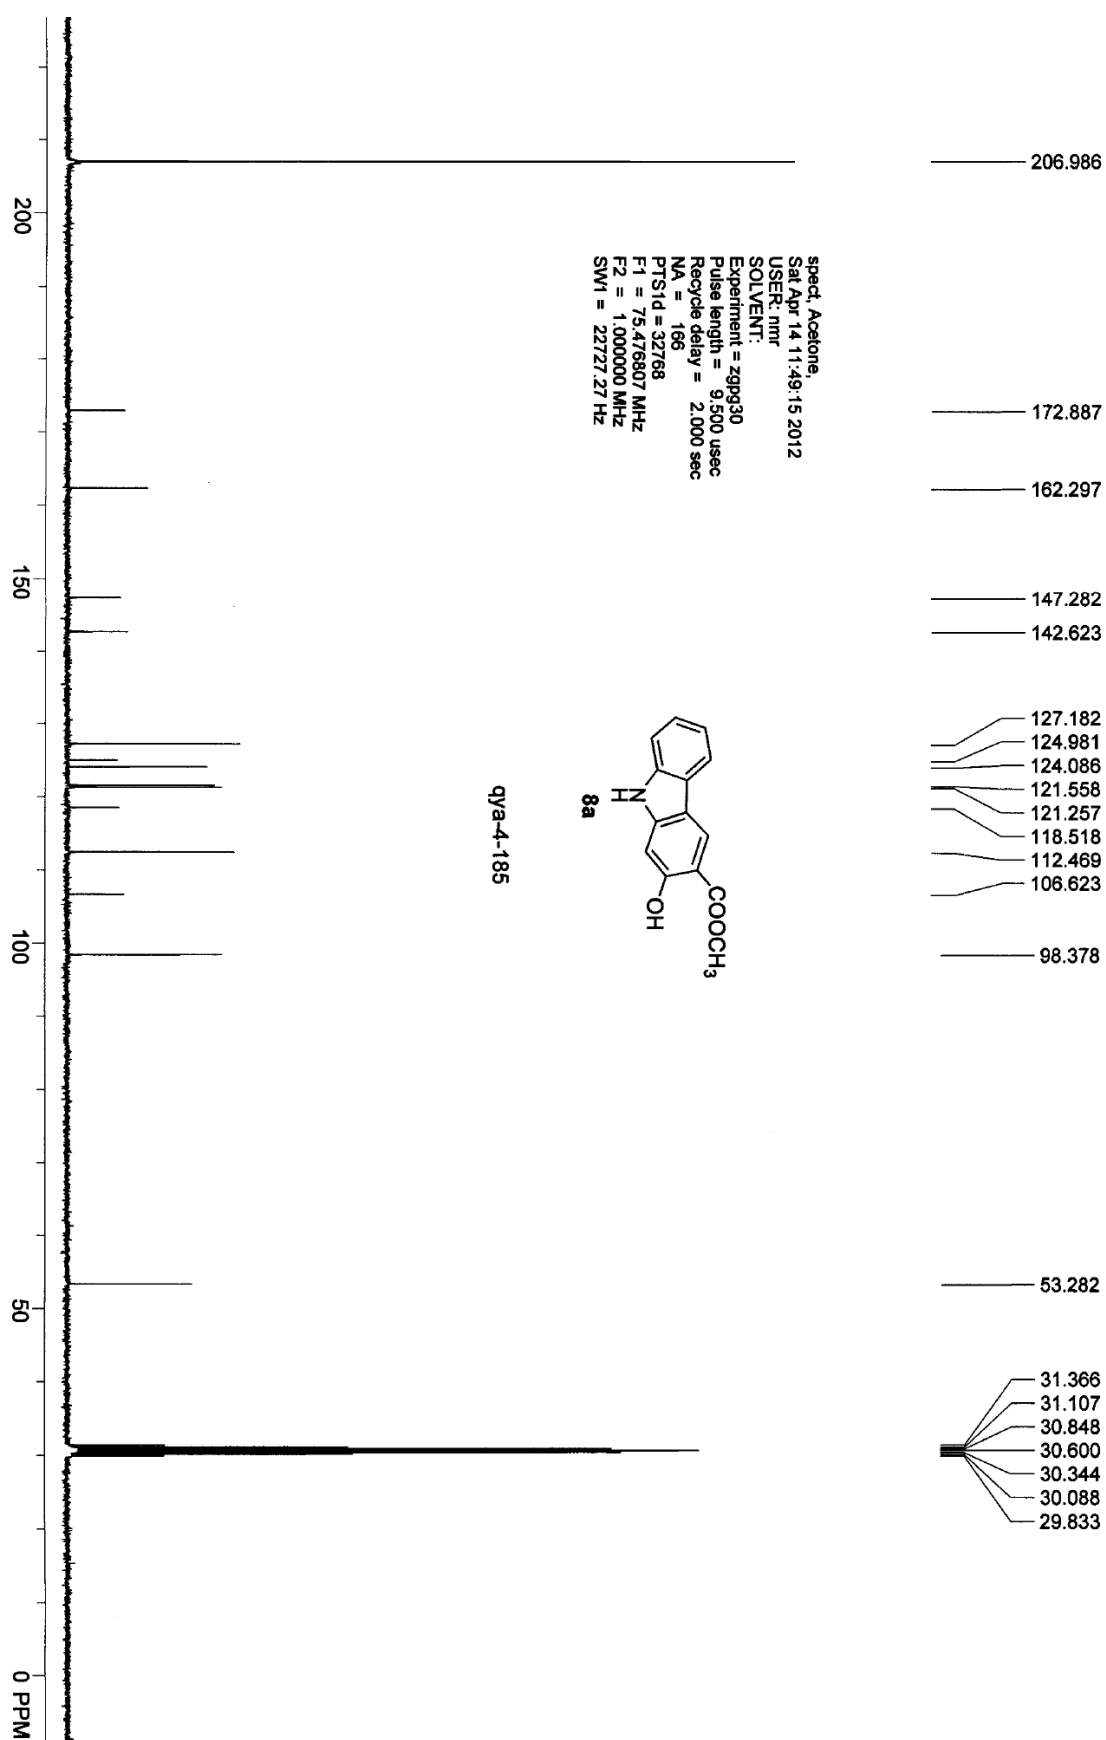

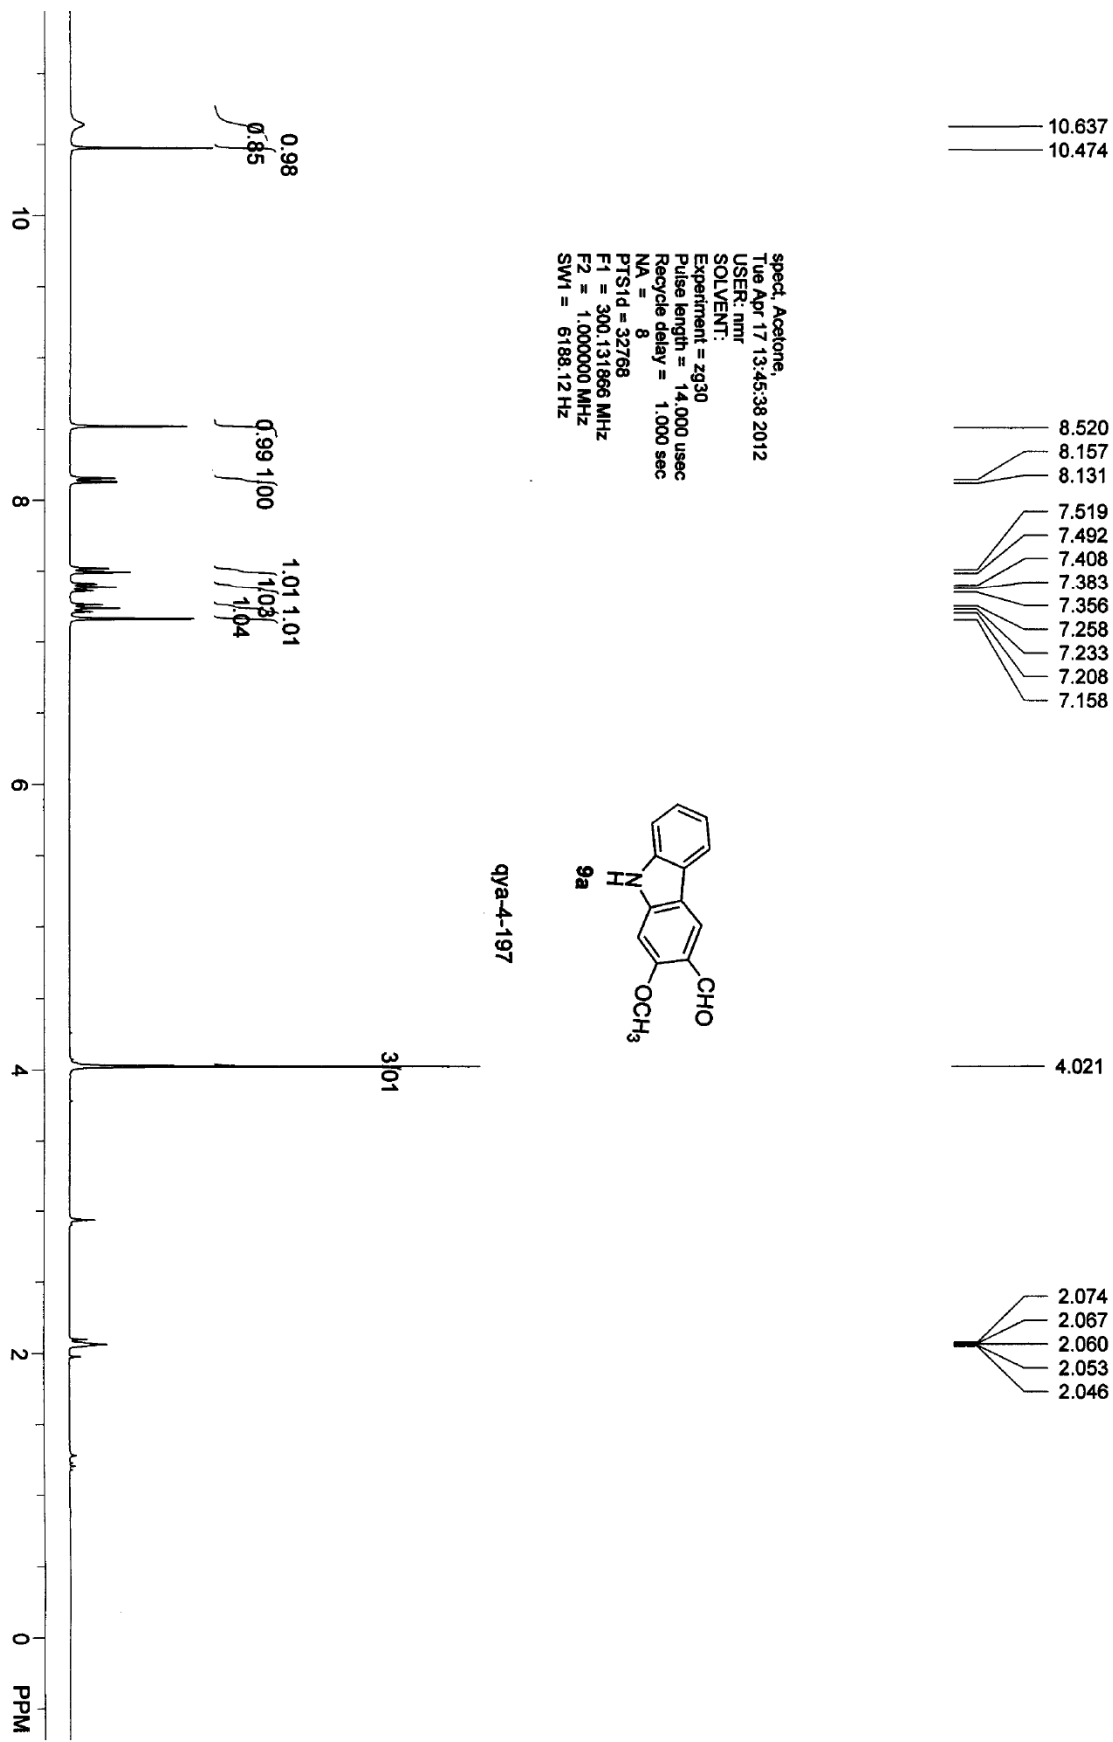

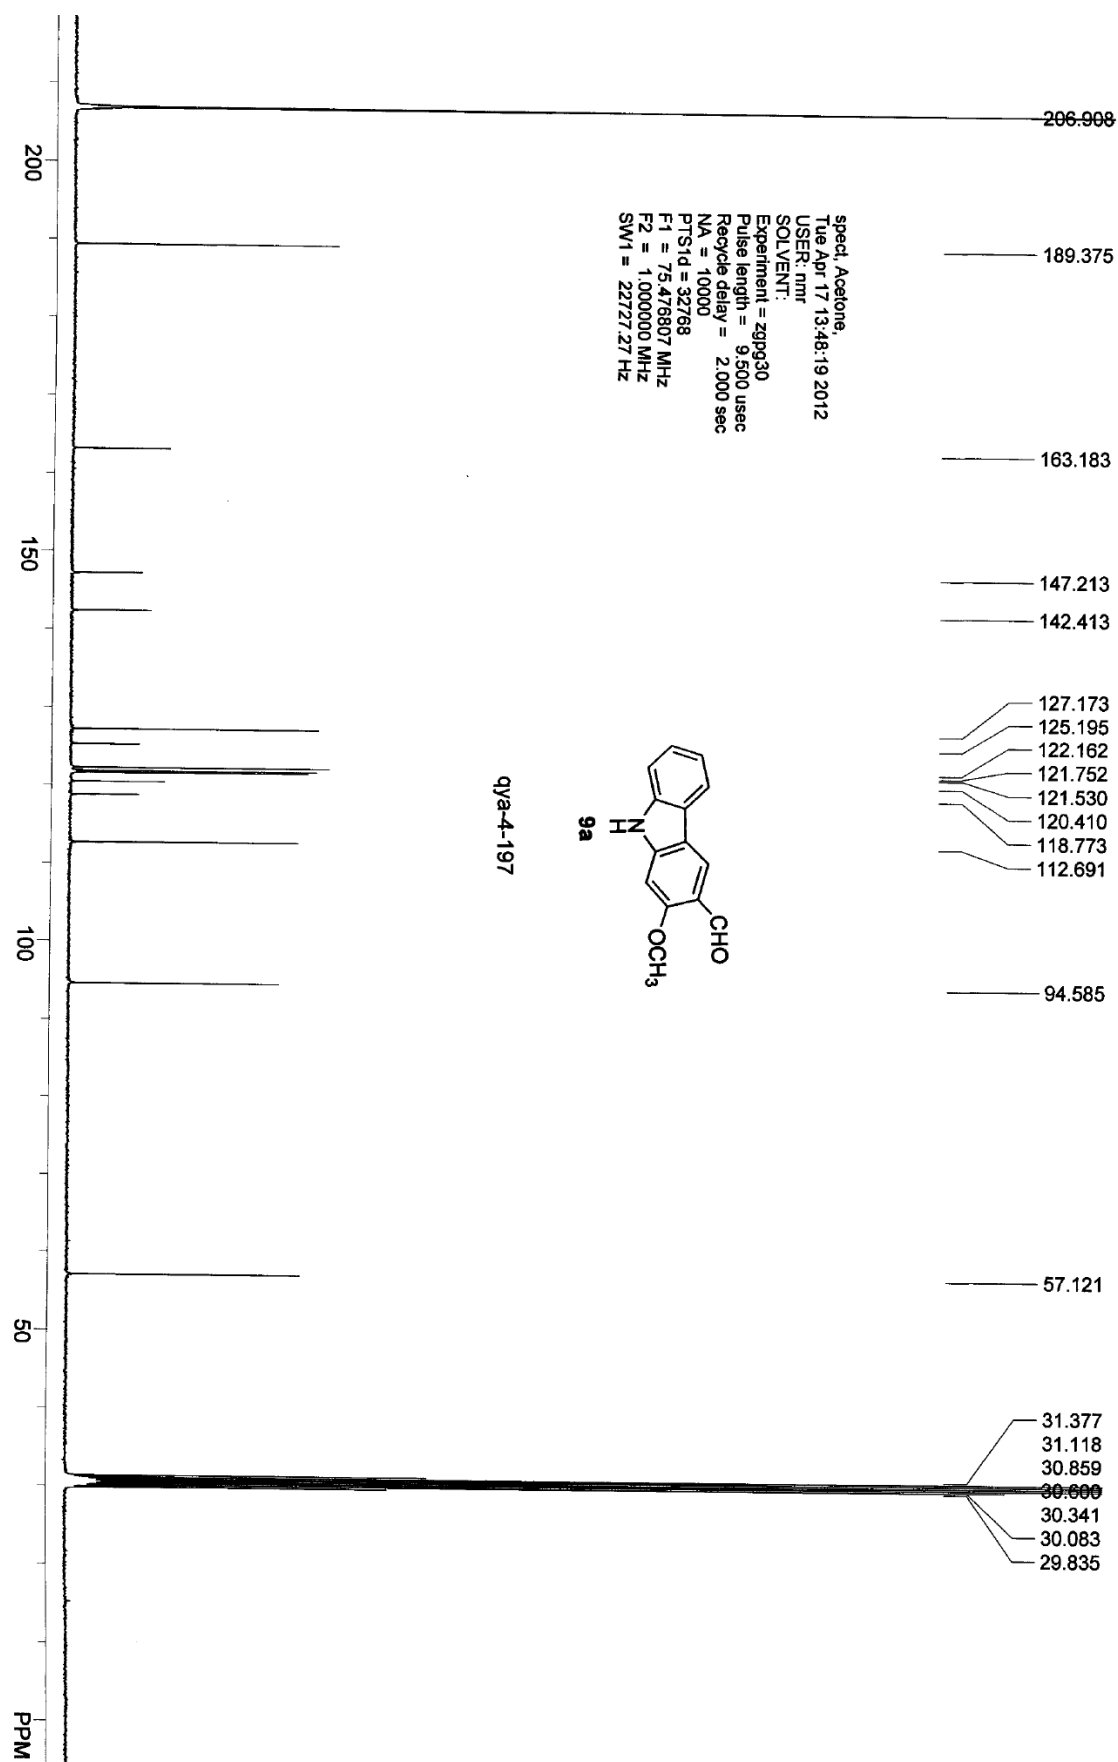

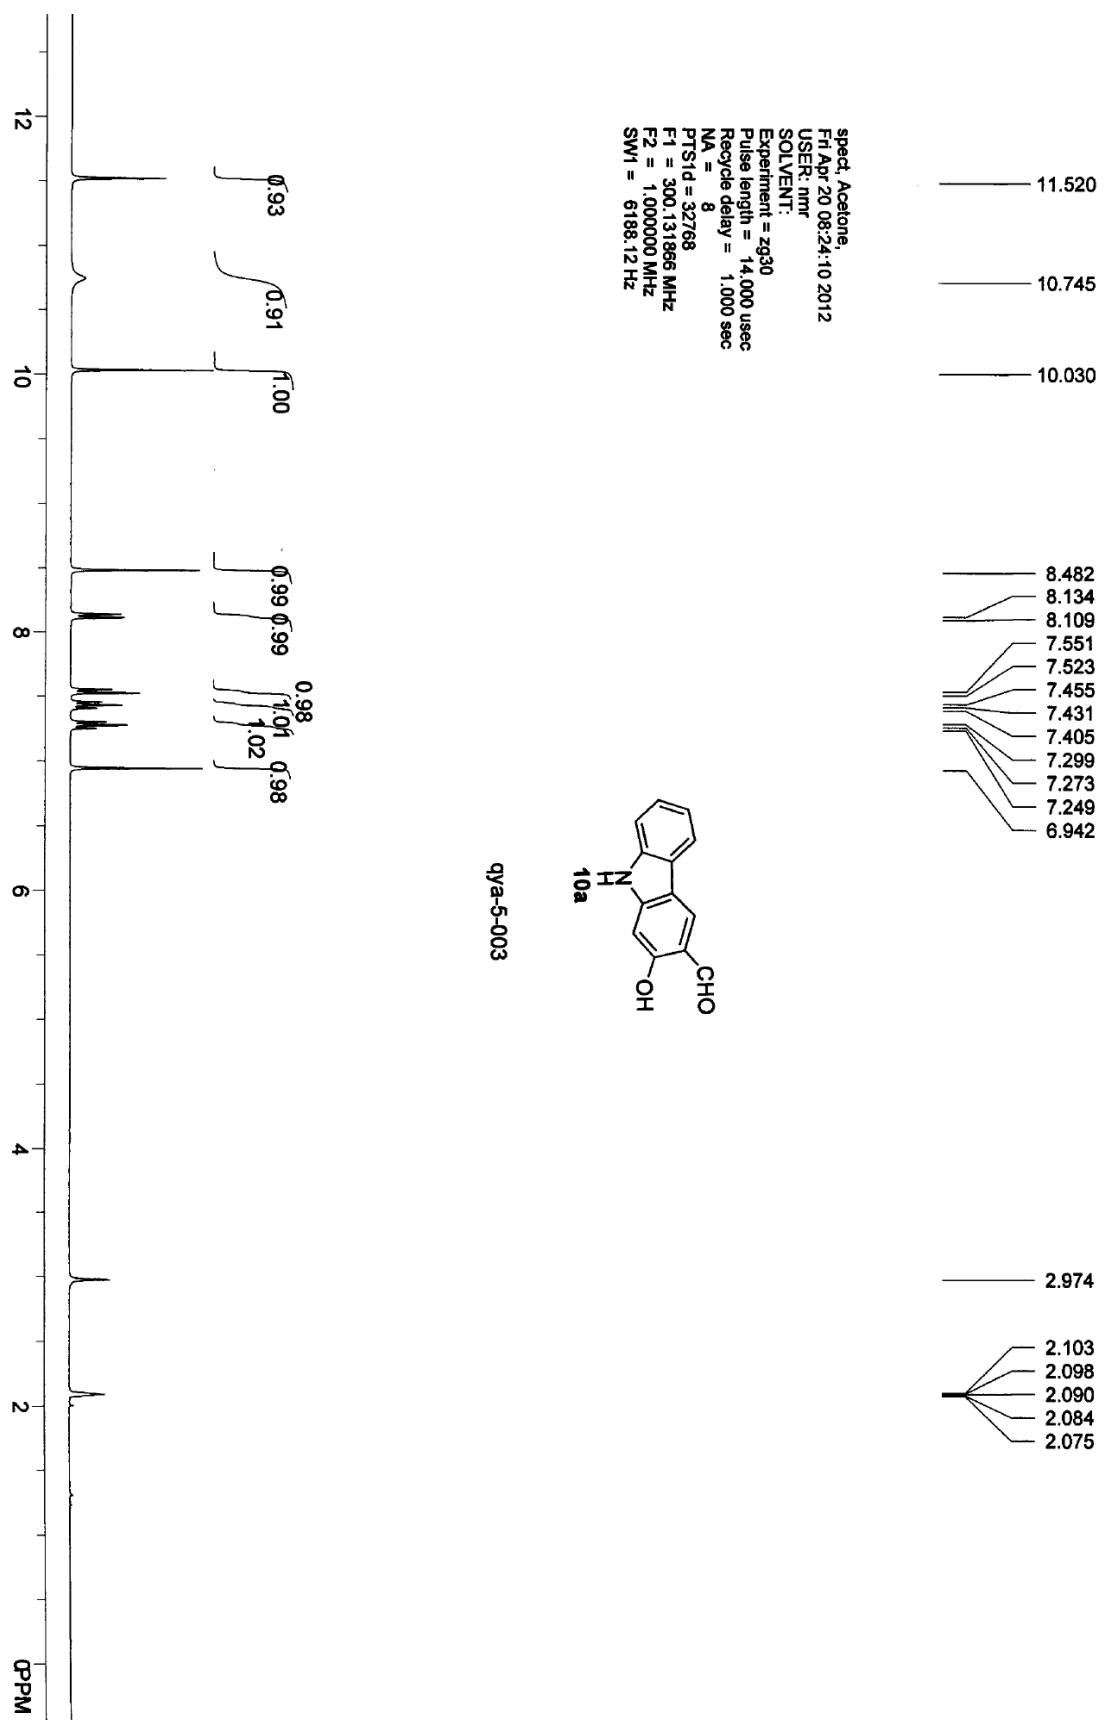

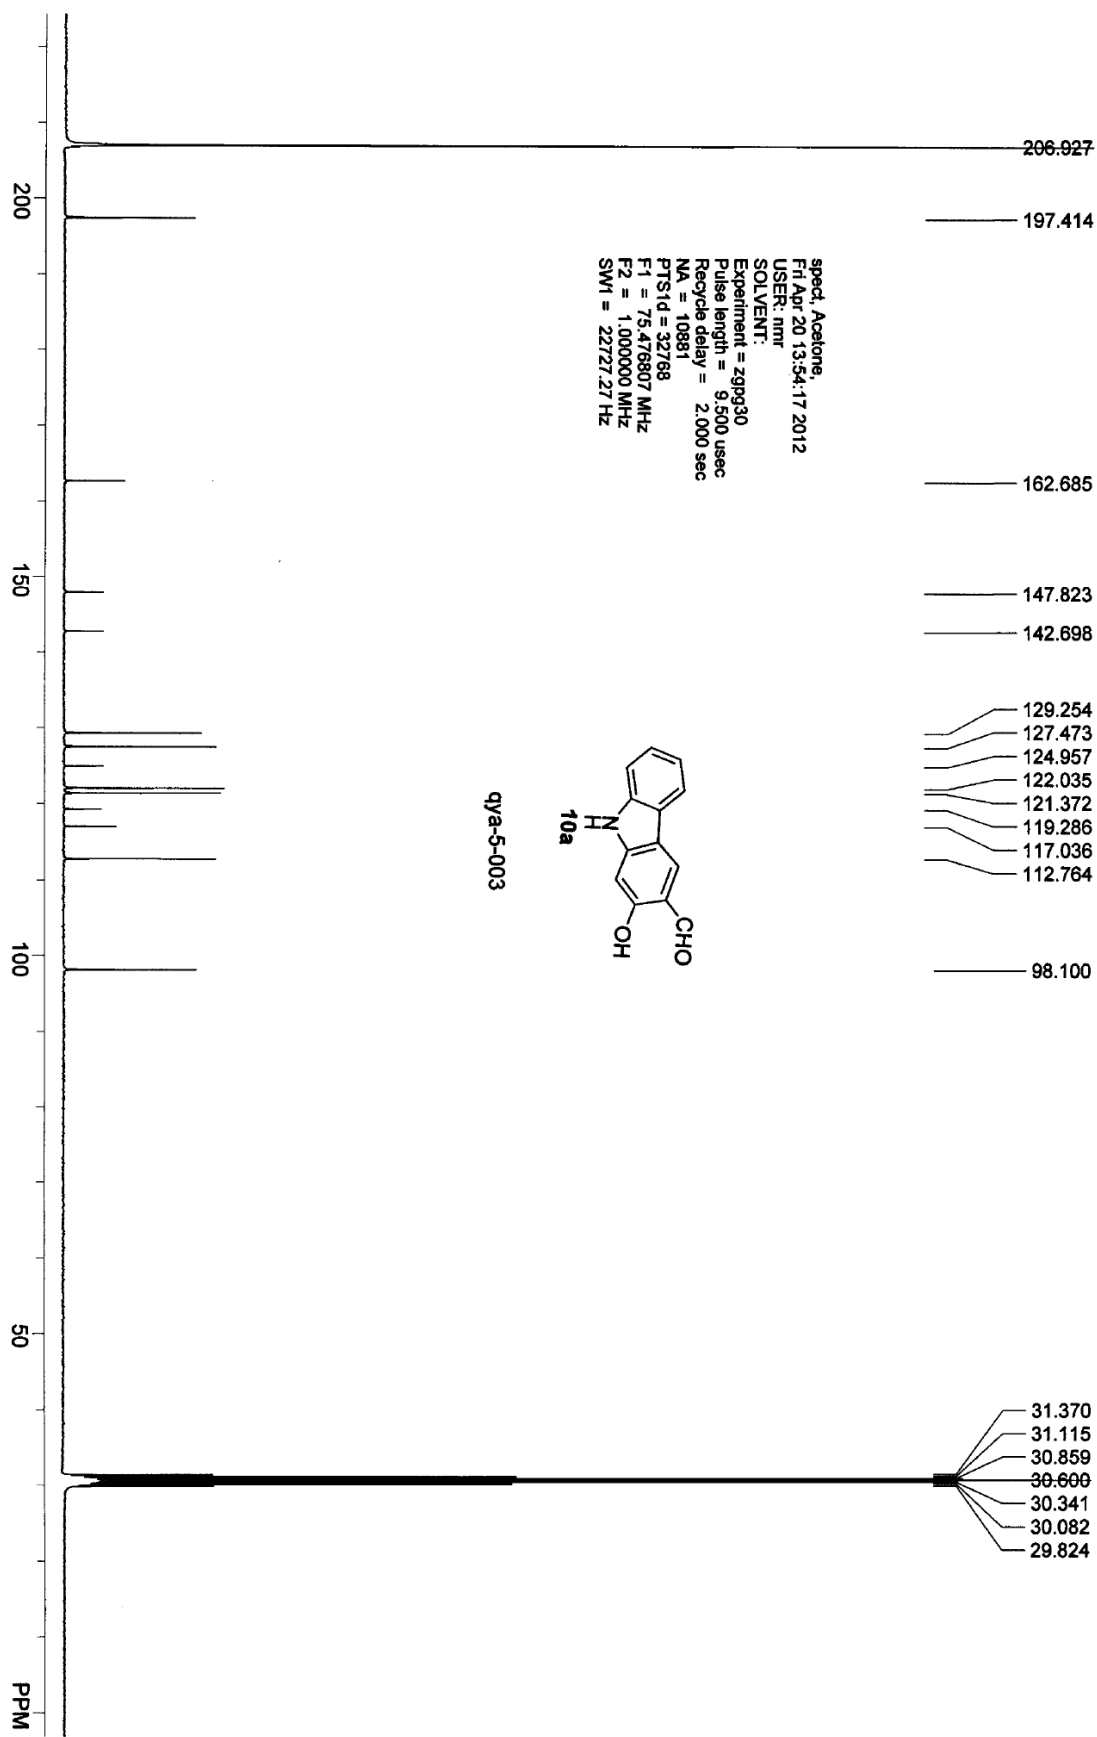

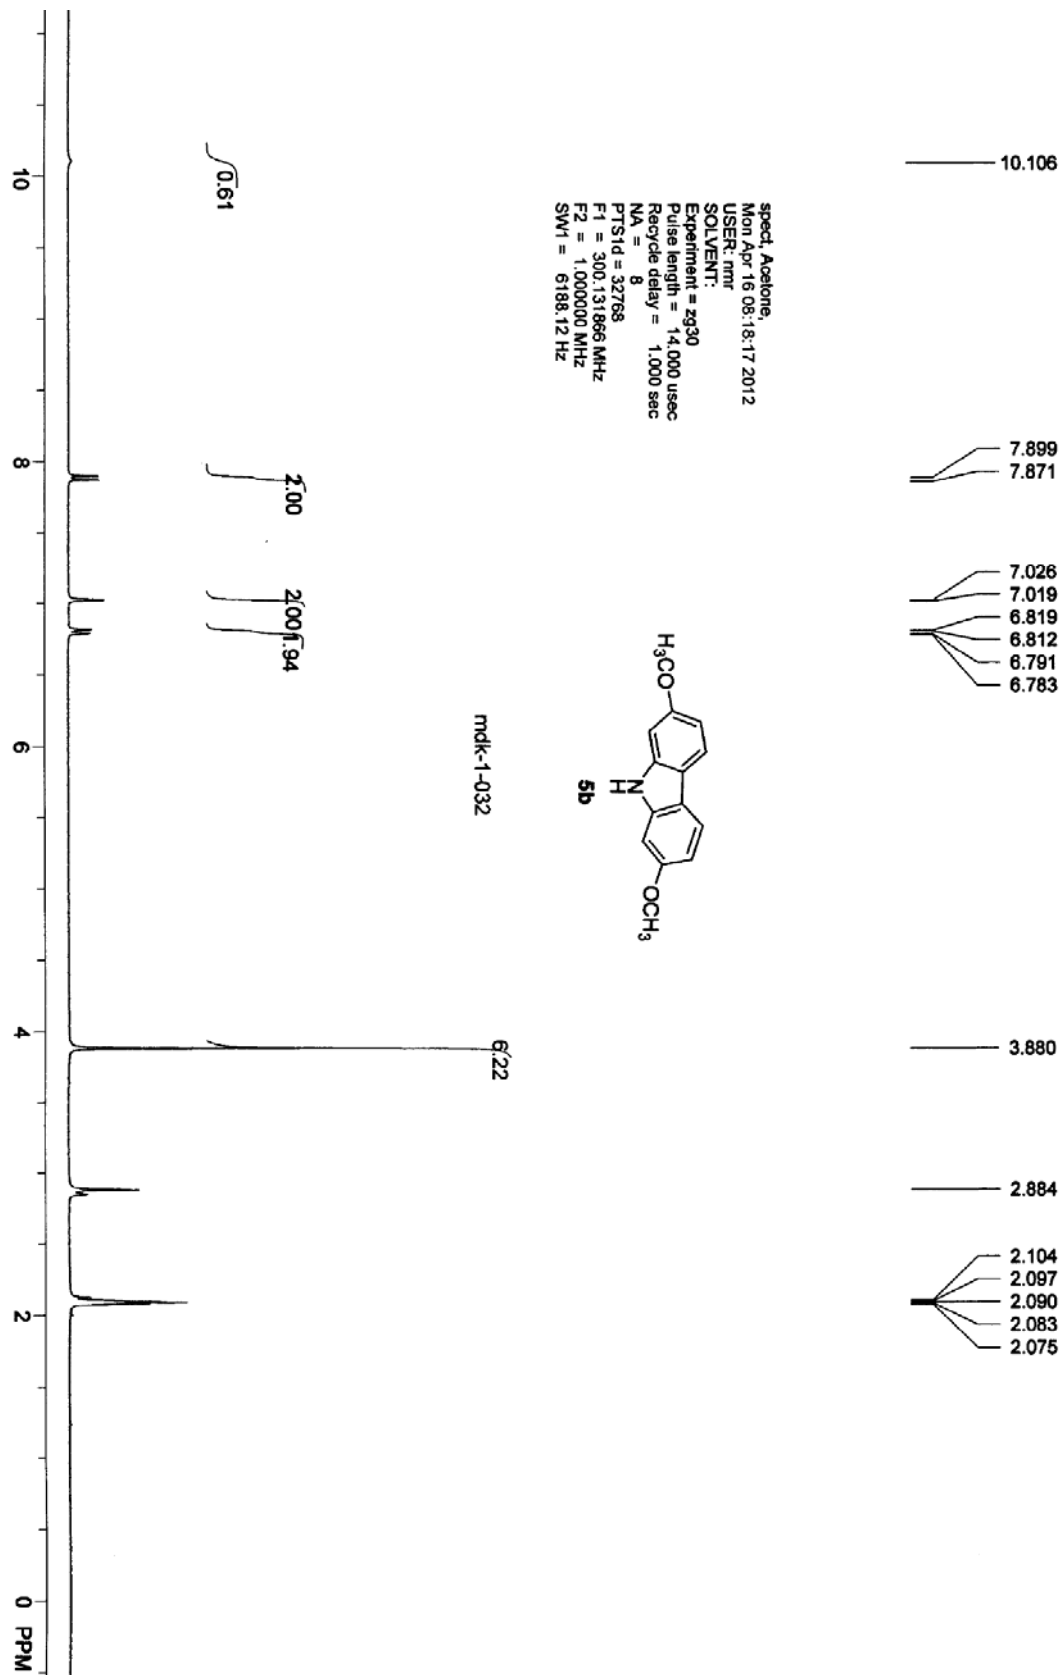

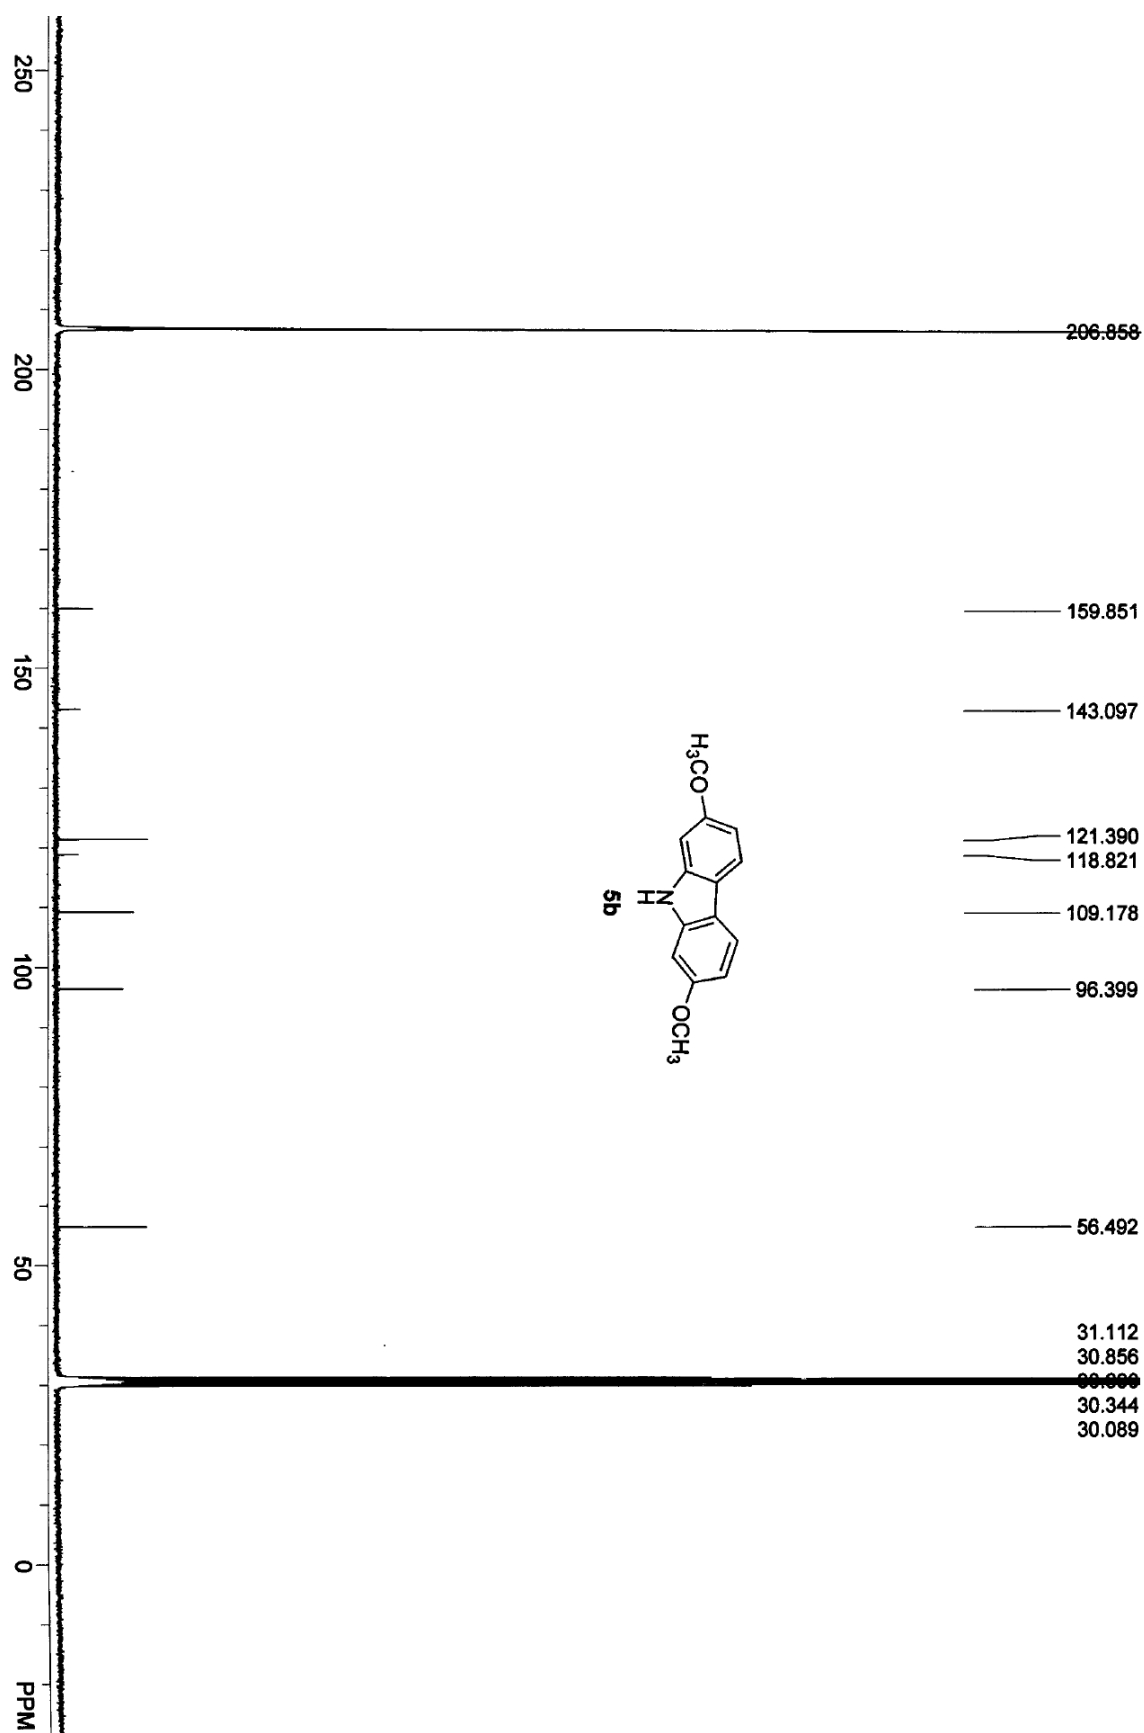

Supplement: c2ob27432a.pdf [file c2ob27432a.pdf]
